# Supplementary material for: Unravelling Differences in Candidate Genes for Drought Tolerance in Potato (Solanum tuberosum L.) by Use of New Functional Microsatellite Markers
Source: PubMed Central journal article supplement (PMC8067248; doi:10.3390/genes12040494), 2021-03-28
Supplement: genes-12-00494-s001.pdf [file genes-12-00494-s001.pdf]

**Table S1. Characterization of potato cultivars**

Cultivar identifier, cultivar name, breeding companies and drought tolerance rank (1t = sensitive, 34t = tolerant) of 34 mostly starch potato cultivars.

| Cultivar ID | Cultivar   | Breeder   | DRYM     | Rank |
|-------------|------------|-----------|----------|------|
| 382         | DESIREE    |           | 0,02191  | 11t  |
| 2673        | ALEGRIA    | NORIKA    | -0,00944 | 22t  |
| 2674        | MILVA      | BERDING   | -0,04122 | 31t  |
| 2675        | SATURNA    | EUROPLANT | 0,03639  | 9t   |
| 2853        | ULME       | BAVARIA   | 0,01636  | 14t  |
| 2854        | ELDENA     | EUROPLANT | 0,02836  | 10t  |
| 2855        | EUROBRAVO  | EUROPLANT | -0,04375 | 33t  |
| 2856        | EUROFLORA  | EUROPLANT | -0,05497 | 34t  |
| 2857        | EURONOVA   | EUROPLANT | 0,00923  | 16t  |
| 2858        | EURORESA   | EUROPLANT | -0,04250 | 32t  |
| 2859        | EUROSTARCH | EUROPLANT | -0,00722 | 21t  |
| 2860        | EUROTANGO  | EUROPLANT | -0,02249 | 27t  |
| 2861        | KURAS      | EUROPLANT | -0,03498 | 29t  |
| 2862        | TOMENSA    | EUROPLANT | -0,01314 | 23t  |
| 2863        | TOMBA      | EUROPLANT | 0,00851  | 17t  |
| 2864        | JUMBO      | FIRLBECK  | 0,01377  | 15t  |
| 2865        | LOGO       | FIRLBECK  | -0,02198 | 26t  |
| 2866        | MAXI       | FIRLBECK  | -0,02845 | 28t  |
| 2867        | POWER      | FIRLBECK  | 0,05740  | 5t   |
| 2868        | SOMMERGOLD | FIRLBECK  | 0,05960  | 4t   |
| 2869        | JASIA      | NIEHOFF   | -0,02031 | 25t  |
| 2870        | ALBATROS   | NORIKA    | 0,05042  | 6t   |
| 2871        | KARLENA    | NORIKA    | 0,08962  | 2t   |
| 2872        | KIEBITZ    | NORIKA    | 0,01824  | 13t  |
| 2873        | KOLIBRI    | NORIKA    | 0,13705  | 1t   |
| 2874        | KORMORAN   | NORIKA    | 0,00216  | 20t  |
| 2875        | MAXILLA    | NORIKA    | 0,00684  | 18t  |
| 2876        | PIROL      | NORIKA    | -0,02001 | 24t  |
| 2877        | BURANA     | SAKA      | 0,00627  | 19t  |
| 2878        | GOLF       | SAKA      | 0,02017  | 12t  |
| 2879        | PRIAMOS    | SAKA      | 0,08819  | 3t   |
| 2880        | RAMSES     | SAKA      | -0,03601 | 30t  |
| 2881        | SIBU       | SAKA      | 0,04748  | 7t   |
| 2882        | VERDI      | SAKA      | 0,03717  | 8t   |

**Supplementary Table S2:** Field trials for ranking the potato cultivars using DRYM as drought stress index (DOI: 10.5447/ipk/2021/7 )

| No. | Location                           | Year | Replications | Number of plants/<br>replication | Treatments                                             |                                                                                 |
|-----|------------------------------------|------|--------------|----------------------------------|--------------------------------------------------------|---------------------------------------------------------------------------------|
|     |                                    |      |              |                                  | Control                                                | Stress                                                                          |
| F1  | MPI-MP Potsdam Golm                | 2011 | 4            | 8                                | 329.76 mm irrigation and precipitation <sup>1</sup>    | 274.32 mm irrigation and precipitation <sup>1</sup>                             |
| F2  | Potato Research Station Dethlingen | 2011 | 2            | 31                               | 50% field capacity <sup>2</sup> (optimal water supply) | (30% field capacity) + no irrigation                                            |
| F3  | MPI-MP Potsdam Golm                | 2012 | 4            | 8                                | 360.88 mm irrigation and precipitation <sup>1</sup>    | 319.74 mm irrigation and precipitation                                          |
| F4  | JKI Groß-Lüsewitz                  | 2012 | 2            | 6                                | 234.5 mm irrigation and precipitation                  | rain-out shelter, watered once at the beginning (20 mm), no watering afterwards |
| F5  | Potato Research Station Dethlingen | 2012 | 2            | 31                               | 50% field capacity <sup>2</sup> (optimal water supply) | 30% field capacity + no irrigation                                              |

<sup>1</sup> Control plots: Drip-irrigation (Netafim) with 10 mm water during the night if plants showed signs of reduced turgor at noon.

Drought stress plots: Drip-irrigation if plants had signs of water deficit 2 h after sunrise

<sup>2</sup> Control plots: Irrigation if soil water content dropped below 50% field capacity.

Drought stress plots: 2 plots - Irrigation with a irrigation boom at 30% field capacity, 2 plots - no irrigation. Field capacity was estimated according to the irrigation advice of the Deutscher Wetterdienst, Braunschweig.

**Table S3. Overview over all 154 derived SSR primer combinations**

Primer combinations that showed significant association with drought tolerance are marked in green.

<sup>1</sup> Primer combinations were in an interrupted complex or an interrupted compound structure of the type (repeats)<sup>k</sup>X (repeats)<sup>n</sup>X (repeats)<sup>m</sup> or (repeats)<sup>n</sup>X (repeats)<sup>m</sup> X exceeded 4 are shown in red.

<sup>2</sup> nd not determined, means Ta and cycle number was not optimized monomorphic primer combinations

| No. | Candidate gene                                                  | Tested SSR primer combination    | Reference (DMG, Phytome)  | Reference (DMT (TROST))                   | Primary transcript                        | Location Gene (Ensemble Plants) SolTuB 3.0                                                          | Gene size (in bp, Ensemble) | Location Gene (Phytome)          | Gene size (in bp, phytome) | ORF size (in bp) | CDS (in bp) | LG | SSR Motif <sup>1</sup>                                                              | Class of microsatellite (Chambers & MacAvoy 2000) | Location of the SSR | Primer sequences in 5'-3' direction (without M13 tail)                   | T <sup>a</sup> in °C <sup>2</sup> | Cycles <sup>2</sup> | Expected size in bp (without M13 tail) |
|-----|-----------------------------------------------------------------|----------------------------------|---------------------------|-------------------------------------------|-------------------------------------------|-----------------------------------------------------------------------------------------------------|-----------------------------|----------------------------------|----------------------------|------------------|-------------|----|-------------------------------------------------------------------------------------|---------------------------------------------------|---------------------|--------------------------------------------------------------------------|-----------------------------------|---------------------|----------------------------------------|
| 1   | ABA8'-hydroxylase (ABASH) CYP707A2                              | HRO_ABA8H4_2                     | PGSC0003<br>DMG40007972   | PGSC0003<br>DMT400020589                  | PGSC0003<br>DMT400020589                  | 4:68244300-68248224                                                                                 | 3895                        | chr04:60375592..60379486 forward | 3895                       | 3346             | 1428        | 4  | (GT) <sub>2</sub> (AT) <sub>7</sub>                                                 | Compound                                          | Intron 6            | CACGTGTCAAATTCCTCGTAAA<br>GGCATACCTTCATCCTTT                             | 60                                | 36                  | 200                                    |
| 2   | ABA 8'-hydroxylase (ABASH4) CYP707A1                            | HRO_ABA8H4_3                     | PGSC0003<br>DMG40001960   | PGSC0003<br>DMT400004951                  | PGSC0003<br>DMT400004951                  | 8:47110633-47113366                                                                                 | 2734                        | chr08:34327986..34330719 reverse | 2734                       | 2368             | 1389        | 8  | (TA) <sub>1</sub> (AT) <sub>2</sub>                                                 | Compound                                          | 3'-UTR              | GGAAAGTAAAGGGGTGCAGA<br>TGTTTCATTAACCTCTTCTTCTT                          | nd                                | nd                  | 181                                    |
| 3   | Abcisic acid receptor PYL4                                      | HRO_ABAPR4                       | PGSC0003<br>DMG400020607  | PGSC0003<br>DMT400053120                  | PGSC0003<br>DMT400053120                  | 3:35855161-35856066                                                                                 | 906                         | chr03:29259065..29295970 reverse | 906                        | 606              | 606         | 3  | (TC) <sub>1</sub> CTTT (GAA) <sub>1</sub>                                           | Interrupted compound                              | 5'-UTR              | TGTAAMAGTACTCATCCCTACC<br>GAGCGGCTTTGGTGAAGT                             | nd                                | nd                  | 144                                    |
| 4   | 1-aminocyclopropane-1-carboxylate oxidase (ACO)                 | HRO_ACCO_1<br>(HRO_ACCO_1)       | PGSC0003<br>DMG400021476  | PGSC0003<br>DMT400055332                  | PGSC0003<br>DMT400055332                  | 2:17740757-17743016                                                                                 | 2260                        | chr02:38908747..3891100 reverse  | 2260                       | 1838             | 960         | 2  | (AT) <sub>8</sub>                                                                   | Pure                                              | Intron 2            | ACAGGTCCAGAGGATCTCCA<br>TGTTTGTAGACCAAAATTCAAA                           | 55                                | 36                  | 134                                    |
| 5   | 1-aminocyclopropane-1-carboxylate oxidase (ACO)                 | HRO_ACCO_4<br>(HRO_ACCO_4)       | PGSC0003<br>DMG400009719  | PGSC0003<br>DMT400025148                  | PGSC0003<br>DMT400025148                  | 9:49787843-49791601                                                                                 | 3759                        | chr09:39308252..39312010 reverse | 3759 (without UTR)         | 3759             | 837         | 9  | (GA) <sub>12</sub>                                                                  | Pure                                              | Intron 3            | TGCTTCGCTATATTGGACA<br>TGAATTTATAGAAACTTTCCTCCT                          | 53                                | 36                  | 172                                    |
| 6   | 1-aminocyclopropane-1-carboxylate oxidase homolog (ACO homolog) | HRO_ACCOHom_1                    | PGSC0003<br>DMG400044665  | PGSC0003<br>DMT400095094                  | PGSC0003<br>DMT400095094                  | 10:45540344-45543554                                                                                | 3211                        | chr10:40921106..40924316 forward | 3211 (without UTR)         | 3211             | 432         | 10 | (TG) <sub>1</sub> (AG) <sub>1</sub>                                                 | Compound                                          | Intron 1            | TCACAGGTGATTCACAGCAAG<br>TGCCGCTGTAGAGTGAAGGT                            | nd                                | nd                  | 204                                    |
| 7   | 1-aminocyclopropane-1-carboxylate synthase (ACS)                | HRO_ACCS_2<br>(HRO_ACCS_2)       | PGSC0003<br>DMG40000284   | PGSC0003<br>DMT400000771                  | PGSC0003<br>DMT400000771                  | 12:3809539-3812003                                                                                  | 2465                        | chr12:4302319..4304783 reverse   | 2465 (without UTR)         | 2465             | 1305        | 12 | (AT) <sub>8</sub>                                                                   | Pure                                              | Intron 2            | ATGCTTCGTTTCCCACT<br>AAAGTGTCTTTTCACTTTCCCTCA                            | 60                                | 36                  | 139                                    |
| 8   | 1-aminocyclopropane-1-carboxylate synthase 2 (ACS2)             | HRO_ACCS2_1<br>(HRO_ACCS2_1)     | PGSC0003<br>DMG40000193   | PGSC0003<br>DMT40000553                   | PGSC0003<br>DMT40000553                   | 1:72662888-72665831                                                                                 | 2944                        | chr01:78802955..78805898 reverse | 2944                       | 2652             | 1461        | 1  | (TTA) <sub>3</sub> T (TAA) <sub>1</sub>                                             | Interrupted compound                              | Intron 3            | CAGTTCCTTGGGGAAATTTG<br>CAAGAAAGAGCTTGGTGAT                              | 55                                | 36                  | 211                                    |
| 9   | 1-aminocyclopropane-1-carboxylate synthase 3 (ACS3)             | HRO_ACCS3_1<br>(HRO_ACCS3)       | PGSC0003<br>DMG400021426  | PGSC0003<br>DMT400055203                  | PGSC0003<br>DMT400055203                  | 2:42416137-42418380                                                                                 | 2244                        | chr02:63671580..63673823 reverse | 2244                       | 1742             | 1410        | 2  | (AT) <sub>8</sub>                                                                   | Pure                                              | Intron 2            | TCAGTTCCTTGGCTTCTTCA<br>TTTGTGTGGCTTGGATTA                               | 55/57                             | 36                  | 159                                    |
| 10  | 1-aminocyclopropane-1-carboxylate synthase 4 (ACS4)             | HRO_ACCS4_1<br>(HRO_ACCS4_1)     | PGSC0003<br>DMG400021651  | PGSC0003<br>DMT400055753                  | PGSC0003<br>DMT400055753                  | 5:44070623-44073744                                                                                 | 3122                        | chr05:53360644..53363685 forward | 3122                       | 2775             | 1143        | 5  | (ACT) <sub>3</sub>                                                                  | Pure                                              | Exon 1              | GGTTCCTTATTTGGTCCAAA<br>GAAAACCTCTTAATAGCAGCA                            | 55                                | 36                  | 104                                    |
| 11  | Aldehyde dehydrogenase family 7 member (ALDH)                   | HRO_ADFMfor_ADHrev<br>(HRO_ALDH) | PGSC0003<br>DMG400034597  | PGSC0003<br>DMT400085026                  | PGSC0003<br>DMT400085026                  | 9:22591541-22597210                                                                                 | 5670                        | chr09:38340472..38346141 reverse | 5670 (without UTR)         | 5670             | 630         | 9  | (AT) <sub>12</sub> (AG) <sub>12</sub> ATA (GA) <sub>1</sub>                         | Interrupted complex                               | Intron 1            | TTCTTGCTGGTATGACCAC<br>ATTCTAATTAATCGCTCTTTTACA                          | 54                                | 36                  | 177                                    |
| 12  | Aldehyde dehydrogenase family 7 member (ALDH)                   | HRO_ADFMfor_ADHrev1              | PGSC0003<br>DMG400034597  | PGSC0003<br>DMT400085026                  | PGSC0003<br>DMT400085026                  | 9:22591541-22597210                                                                                 | 5670                        | chr09:38340472..38346141 reverse | 5670 (without UTR)         | 5670             | 630         | 9  | (AT) <sub>12</sub> (AG) <sub>12</sub> ATA (GA) <sub>1</sub>                         | Interrupted complex                               | Intron 1            | TTCTTGCTGGTATGACCAC<br>GGAAGTATGAAACTAATATCATC GGAA                      | nd                                | nd                  | 216                                    |
| 13  | Aldehyde dehydrogenase family member 7 A1 (ALDH)                | HRO_ADFM_ADHrev                  | PGSC0003<br>DMG400034597  | PGSC0003<br>DMT400085026                  | PGSC0003<br>DMT400085026                  | 9:22591541-22597210                                                                                 | 5670                        | chr09:38340472..38346141 reverse | 5669 (without UTR)         | 5670             | 630         | 9  | (AT) <sub>12</sub> (AG) <sub>12</sub> ATA (GA) <sub>1</sub>                         | Interrupted complex                               | Intron 1            | TTCTTGCTGGTATGACCAC<br>ATTCFAATTAATCGCTCTTTTACA                          | nd                                | nd                  | 177                                    |
| 14  | Aldehyde dehydrogenase family member 7 A1 (ALDH)                | HRO_ADH                          | PGSC0003<br>DMG400034597  | PGSC0003<br>DMT400085026                  | PGSC0003<br>DMT400085026                  | 9:22591541-22597210                                                                                 | 5670                        | chr09:38340472..38346141 reverse | 5669 (without UTR)         | 5670             | 630         | 9  | (AT) <sub>12</sub> (AG) <sub>12</sub> ATA (GA) <sub>1</sub>                         | Interrupted complex                               | Intron 1            | TTCTTGCTGGTATGACCAC<br>ATTCFAATTAATCGCTCTTTTACA                          | nd                                | nd                  | 195                                    |
| 15  | Aldehyde dehydrogenase family member 7 A1 (ALDH)                | HRO_ADHfor_ADHrev                | PGSC0003<br>DMG400034597  | PGSC0003<br>DMT400085026                  | PGSC0003<br>DMT400085026                  | 9:22591541-22597210                                                                                 | 5670                        | chr09:38340472..38346141 reverse | 5669 (without UTR)         | 5670             | 630         | 9  | (AT) <sub>12</sub> (AG) <sub>12</sub> ATA (GA) <sub>1</sub>                         | Interrupted complex                               | Intron 1            | TTCTTGCTGGTATGACCAC<br>TGAGATCTTTGGTATAGGAAG                             | nd                                | nd                  | 234                                    |
| 16  | Aldehyde dehydrogenase family member 7 A1 (ALDH)                | HRO_ADFMfor_ADHrev2              | PGSC0003<br>DMG400034597  | PGSC0003<br>DMT400085026                  | PGSC0003<br>DMT400085026                  | 9:22591541-22597210                                                                                 | 5670                        | chr09:38340472..38346141 reverse | 5669 (without UTR)         | 5670             | 630         | 9  | (AT) <sub>12</sub> (AG) <sub>12</sub> ATA (GA) <sub>1</sub>                         | Interrupted complex                               | Intron 1            | TTCTTGCTGGTATGACCAC<br>ATTAACCTCTTTTACA                                  | nd                                | nd                  | 189                                    |
| 17  | Ascorbate peroxidase (APX)                                      | HRO_APX_2                        | PGSC0003<br>DMG4000401731 | PGSC0003<br>DMT400004360                  | PGSC0003<br>DMT400004360                  | 9:6599287-6603984                                                                                   | 4698                        | chr09:32259008..3230605 forward  | 4698                       | 4207             | 753         | 9  | (TA) <sub>3</sub> C (TA) <sub>1</sub>                                               | Interrupted pure                                  | 3'-UTR              | AAAGTCTAAAGCAACCTTTCA<br>TGAGATCTGACGGAACATAGC                           | 57                                | 36                  | 174                                    |
| 18  | Apyrase (APY)                                                   | HRO_APY_2                        | PGSC0003<br>DMG40007656   | PGSC0003<br>DMT400019809                  | PGSC0003<br>DMT400019809                  | 8:9072734-9079782                                                                                   | 7049                        | chr08:8146602..8153650 reverse   | 7049                       | 6340             | 1419        | 8  | (CT) <sub>3</sub> G (CT) <sub>3</sub>                                               | Interrupted compound                              | Intron 6            | CAATGCTGGTGTCTGCTCC<br>TTTGGGAAAACAGAAAGTTGA                             | nd                                | nd                  | 190                                    |
| 19  | Apyrase (APY)                                                   | HRO_APY_3                        | PGSC0003<br>DMG40005278   | PGSC0003<br>DMT400053021                  | PGSC0003<br>DMT400053021                  | 9:59667071-59670753                                                                                 | 3683                        | chr09:50849737..50853419 reverse | 3683 (without UTR)         | 3683             | 849         | 9  | (AT) <sub>2</sub> A (ATT) <sub>2</sub>                                              | Interrupted compound                              | Intron 4            | TTTCTTGATATGGCTTCTGAAG<br>TGATCTTTTGGTCAACATAA                           | nd                                | nd                  | 190                                    |
| 20  | Apyrase 2 (APY2)                                                | HRO_APY2_1                       | EU125182.1 (NCBI)         | PGSC0003<br>DMG400020578 - but only 59 bp | PGSC0003<br>DMG400020578 - but only 59 bp | 12:59342085-59343791<br>(Ensembl.BLAST Seq 99.2% ID)<br>chr12:65973640..65977563<br>(Phytome.BLAST) | 3909 (NCBI)                 | -                                | -                          | -                | -           | 12 | (TA) <sub>3</sub><br>(CAA) <sub>2</sub>                                             | Compound                                          | unknown             | GGACAAAAGACTTATCATGCTCA<br>TGGTGGAAAAGCGTGGAAA                           | nd                                | nd                  | 161                                    |
| 21  | Apyrase 3 (APY3)                                                | HRO_APY3_1                       | PGSC0003<br>DMG400031318  | PGSC0003<br>DMT400093747                  | PGSC0003<br>DMT400093747                  | 2:16368634-16370254                                                                                 | 1621                        | chr02:39965172..39966792 forward | 1621 (without UTR)         | 1621             | 720         | 2  | (TA) <sub>8</sub>                                                                   | Pure                                              | Intron 1            | TCCTTTGGGAACATTAATTGACATC<br>AACTCCCAAAATACATGGAC                        | nd                                | nd                  | 213                                    |
| 22  | Auxin response factor 6 (ARF6)                                  | HRO_ARF6_1                       | PGSC0003<br>DMG40002826   | PGSC0003<br>DMT400074168                  | PGSC0003<br>DMT400074168                  | 12:5941093-5948789                                                                                  | 7697                        | chr12:5882473..5860169 reverse   | 7697                       | 6821             | 2655        | 12 | (CT) <sub>2</sub> (TAAAT) <sub>2</sub> (GAA) <sub>2</sub>                           | Complex                                           | Intron 6            | CCTGTACTGGCGGTTAAA<br>TGAATCCAGCTCAGGAGAAA                               | 55                                | 36                  | 219                                    |
| 23  | Bacterial spot disease resistance protein 4 (BS4)               | HRO_BSDRPM_5A                    | PGSC0003<br>DMG400002427  | PGSC0003<br>DMT400006231                  | PGSC0003<br>DMT400006231                  | 6:11390359-11397114                                                                                 | 6756                        | chr06:14395786..14402541 forward | 6756                       | 6236             | 3594        | 6  | (TCT) <sub>1</sub> GTG (AGT) <sub>2</sub>                                           | Interrupted compound                              | Exon 1              | TGATCTCACTGGATCATACA<br>GGGTATCTCGCTCTGAAA                               | 55                                | 36                  | 132                                    |
| 24  | Bacterial spot disease resistance protein 4 (BS4)               | HRO_BSDRPM_5B                    | PGSC0003<br>DMG400002427  | PGSC0003<br>DMT400006231                  | PGSC0003<br>DMT400006231                  | 6:11390359-11397114                                                                                 | 6756                        | chr06:14395786..14402541 forward | 6756                       | 6236             | 3594        | 6  | (TA) <sub>1</sub> A (CT) <sub>2</sub>                                               | Interrupted compound                              | Intron 2            | TCAAAGACTTGAAGTCAAAAA<br>CAACTTAATGACTTGTGCTTCA<br>CGGGAATTTAATAAAGCATGC | nd                                | nd                  | 147                                    |
| 25  | Bacterial spot disease resistance protein 4 (BS4)               | HRO_BSDRPM_5C                    | PGSC0003<br>DMG400002427  | PGSC0003<br>DMT400006231                  | PGSC0003<br>DMT400006231                  | 6:11390359-11397114                                                                                 | 6756                        | chr06:14395786..14402541 forward | 6756                       | 6236             | 3594        | 6  | (TTTA) <sub>1</sub> T (TA) <sub>2</sub>                                             | Interrupted compound                              | Intron 3            | TCAAAGTGTGAATGAAATTTG<br>CGTAACTCTGCTATGAAGG<br>TGTAAAGAAATGTGCTGACC     | 55                                | 36                  | 152                                    |
| 26  | Bacterial spot disease resistance protein 4 (BS4)               | HRO_BSDRPM_9C                    | PGSC0003<br>DMG400031476  | PGSC0003<br>DMT400080813                  | PGSC0003<br>DMT400080813                  | 11:1492867-1496748                                                                                  | 3882                        | -                                | -                          | -                | -           | 11 | (CT) <sub>2</sub> (TA) <sub>2</sub> T (TAA) <sub>2</sub>                            | Interrupted complex                               | unknown             | TGGACAAAATTTGGATTCG<br>TGCTTATCTCCCGATCC                                 | 55                                | 36                  | 143                                    |
| 27  | Bacterial spot disease resistance protein 4 (BS4)               | HRO_BSDRPM_9A                    | PGSC0003<br>DMG400031476  | PGSC0003<br>DMT400080813                  | PGSC0003<br>DMT400080813                  | 11:1492867-1496748                                                                                  | 3882                        | -                                | -                          | -                | -           | 11 | (CT) <sub>2</sub> (TA) <sub>2</sub> (ATC) <sub>2</sub>                              | Complex                                           | unknown             | TTCAGTTCGTGTGATTCAG<br>TGAGGAGTGTGCTCTTT                                 | 60                                | 34                  | 175                                    |
| 28  | BED finger-NBS-LRR resistance protein                           | HRO_BFNBLRP_2C                   | PGSC0003<br>DMG400013736  | PGSC0003<br>DMT400035714                  | PGSC0003<br>DMT400035714                  | 12:6955533-6968015                                                                                  | 5283                        | chr12:6866913..6872195 reverse   | 5283                       | 3802             | 2697        | 12 | (TA) <sub>1</sub> GACTA (TC) <sub>1</sub> ATTC (TTTA) <sub>1</sub>                  | Interrupted complex                               | 3'-UTR              | CATGGAATAATGTTGGTCCAG<br>CCGAGTATAAGCAATCCA                              | nd                                | nd                  | 154                                    |
| 29  | BED finger-NBS-LRR resistance protein                           | HRO_BFNBLRP_2A                   | PGSC0003<br>DMG400013736  | PGSC0003<br>DMT400035714                  | PGSC0003<br>DMT400035714                  | 12:6955533-6968015                                                                                  | 5283                        | chr12:6866913..6872195 reverse   | 5283                       | 3802             | 2697        | 12 | (GT) <sub>2</sub> TTT (TG) <sub>2</sub> (GA) <sub>1</sub>                           | Interrupted complex                               | 5'-UTR              | GGTGTGGGTGAAGCATCA<br>CCTTCGCAATTTCTGGACA                                | nd                                | nd                  | 125                                    |
| 30  | BED finger-NBS-LRR resistance protein                           | HRO_BFNBLRP_2B                   | PGSC0003<br>DMG400013736  | PGSC0003<br>DMT400035714                  | PGSC0003<br>DMT400035714                  | 12:6955533-6968015                                                                                  | 5283                        | chr12:6866913..6872195 reverse   | 5283                       | 3802             | 2697        | 12 | (GA) <sub>1</sub> G (CA) <sub>2</sub>                                               | Interrupted compound                              | Exon 1              | GGTGTGGGTGAAGCATCA<br>CCTTCGCAATTTCTGGACA                                | nd                                | nd                  | 125                                    |
| 31  | Beta-amylase (BA)                                               | HRO_BA_1                         | PGSC0003<br>DMG400000485  | PGSC0003<br>DMT400000485                  | PGSC0003<br>DMT400000485                  | 1:7210919-72114159                                                                                  | 9241                        | chr01:78244986..78254226 reverse | 9241                       | 7195             | 2088        | 1  | (GAG) <sub>2</sub> AAA (GAA) <sub>2</sub><br>(GA) <sub>1</sub> A (GAA) <sub>2</sub> | Interrupted complex                               | Intron 5            | CGGTGTTTAAAGGCAATA<br>TGATCTGTTTGGATCGAGGA<br>AATCATCAACGCCACATA         | 55/57                             | 36                  | 213                                    |
| 32  | Beta-amylase (BA)                                               | HRO_BA7_1                        | PGSC0003<br>DMG400026199  | PGSC0003<br>DMT400067405                  | PGSC0003<br>DMT400067405                  | 7:47346058-47350374                                                                                 | 4317                        | chr07:45794514..45798195 reverse | 3682 (without UTR)         | 3682             | 1764        | 7  | (GTT) <sub>1</sub> (GT) <sub>2</sub>                                                | Compound                                          | Intron 1            | AGAGGATCAACAGTCTTTCTGA<br>TTCGTTGGCGTAAATGTT                             | nd                                | nd                  | 161                                    |
| 33  | Beta-D-glucan exohydrolase (BDGEH)                              | HRO_BDGEH_1A                     | PGSC0003<br>DMG400205942  | PGSC0003<br>DMT400015224                  | PGSC0003<br>DMT400015224                  | 6:54345177-54347242                                                                                 | 2066                        | chr06:49595917..49597982 reverse | 2066                       | 1595             | 1116        | 6  | (TC) <sub>2</sub> C (ATG) <sub>2</sub> CTACA (AG) <sub>2</sub>                      | Interrupted complex                               | Intron 4            | GGCTGTAATCCGGTCAATG<br>AGTCACTGCTTCATTGAGA                               | 57                                | 36                  | 138                                    |
| 34  | Beta-D-glucan exohydrolase (BDGEH)                              | HRO_BDGEH_1B                     | PGSC0003<br>DMG400205942  | PGSC0003<br>DMT400015224                  | PGSC0003<br>DMT400015224                  | 6:54345177-54347242                                                                                 | 2066                        | chr06:49595917..49597982 reverse | 2066                       | 1595             | 1116        | 6  | (GT) <sub>1</sub> (TA) <sub>2</sub> CTGG (AT) <sub>1</sub>                          | Interrupted complex                               | Intron 1            | TGAAGAATCACTGGTACTCA<br>CCGGAATATCCCTGAAAT<br>TGCACACACCGGCTATAG         | 55                                | 36                  | 185                                    |
| 35  | Betaine aldehyde dehydrogenase (BADH)                           | HRO_BADH_1                       | PGSC0003<br>DMG400033028  | PGSC0003<br>DMT400083025                  | PGSC0003<br>DMT400083025                  | 6:52130166-52135413                                                                                 | 5248                        | chr06:47094788..47100035 reverse | 5248                       | 4904             | 1515        | 6  | (T) <sub>2</sub>                                                                    | Pure                                              | Intron 1            | ACACTGCAACCGGCTATAG<br>ACACTGCAACCGGCTATAG                               | 55                                | 36                  | 195                                    |
| 36  | Betaine aldehyde dehydrogenase (BADH)                           | HRO_BADH_2                       | PGSC0003<br>DMG400033028  | PGSC0003<br>DMT400083025                  | PGSC0003<br>DMT400083025                  | 6:52130166-52135413                                                                                 | 5248                        | chr06:47094788..47100035 reverse | 5248                       | 4904             | 1515        | 6  | (GT) <sub>2</sub> CA (GT) <sub>1</sub>                                              | Interrupted pure                                  | Intron 9            | TGTTTCATTTCAATGCAAGA<br>TAAAGGCCATGTTGCTGAC                              | 55                                | 36                  | 195                                    |
| 37  | Betaine aldehyde dehydrogenase (BADH)                           | HRO_BADH_3                       | PGSC0003<br>DMG400033028  | PGSC0003<br>DMT400083025                  | PGSC0003<br>DMT400083025                  | 6:52130166-52135413                                                                                 | 5248                        | chr06:47094788..47100035 reverse | 5248                       | 4904             | 1515        | 6  | (CTGAT) <sub>1</sub>                                                                | Pure                                              | Intron 14           | GCCTTCTAACATGAAAGCTCA<br>TTCACCAACAAGGCCAATA                             | 50                                | 36                  | 159                                    |
| 38  |                                                                 |                                  |                           |                                           |                                           |                                                                                                     |                             |                                  |                            |                  |             |    |                                                                                     |                                                   |                     |                                                                          |                                   |                     |                                        |

|    |                                                         |                |                          |                          |                          |                       |       |                                  |                    |       |      |    |                                                                                  |                      |                   |                                                   |       |    |     |
|----|---------------------------------------------------------|----------------|--------------------------|--------------------------|--------------------------|-----------------------|-------|----------------------------------|--------------------|-------|------|----|----------------------------------------------------------------------------------|----------------------|-------------------|---------------------------------------------------|-------|----|-----|
| 39 | Dehydration responsive element binding factor 1 (DREB1) | HRO_DREB1_1    | PGSC0003<br>DMT400012525 | PGSC0003<br>DMT400032622 | PGSC0003<br>DMT400032622 | 8.110755-112152       | 1398  | chr08:786238..787635 reverse     | 1398               | 717   | 717  | 8  | (AAAAAG) <sub>10</sub>                                                           | Pure                 | 3'-UTR            | TGCTTTGTGGAGTTACAGATTGGA<br>AATAGGACGGGGAGGAGTACA | nd    | nd | 148 |
| 40 | Delta 1-pyrroline-5-carboxylate synthetase (P5CS)       | HRO_D1P5CS_1   | PGSC0003<br>DMG402026767 | PGSC0003<br>DMT400068829 | PGSC0003<br>DMT400068829 | 6.15776837-15786259   | 9423  | chr06:14263202..14272624 reverse | 9423               | 8928  | 2154 | 6  | (TTA) <sub>10</sub>                                                              | Pure                 | 3'-UTR            | CAAGGGATCTGGACAGTT<br>CATCAAAAATGGCCCTTACCA       | 55/57 | 36 | 187 |
| 41 | Delta 1-pyrroline-5-carboxylate synthetase (P5CS)       | HRO_D1P5CS_2   | PGSC0003<br>DMG40006829  | PGSC0003<br>DMT40006829  | PGSC0003<br>DMT40006829  | 6.15776837-15786259   | 9423  | chr06:14263202..14272624 reverse | 9423               | 8928  | 2154 | 6  | (CT) <sub>2</sub> T (TA) <sub>2</sub>                                            | Interrupted compound | Intron 1          | CGGACATTTGTAAAGGATGT<br>CGGACACCAACCTCTGTATC      | 57    | 36 | 168 |
| 42 | DNA-binding protein 4 (DBP4)                            | HRO_DBP4_1     | PGSC0003<br>DMG40008391  | PGSC0003<br>DMT400021625 | PGSC0003<br>DMT400021625 | 10.53176675-53181319  | 4645  | chr10:45985853..45990497 reverse | 4645               | 4303  | 657  | 10 | (CA) <sub>2</sub> AA (AT) <sub>2</sub> (TA) <sub>2</sub>                         | Interrupted complex  | Intron 2          | GGCATCTTGGAGCAAAATA<br>TGCATGTCTTCCACCTTCA        | nd    | nd | 216 |
| 43 | EIN2 targeting protein 1 (ETP1)                         | HRO_ETP1_1     | PGSC0003<br>DMG400028237 | PGSC0003<br>DMT400072568 | PGSC0003<br>DMT400072568 | 10.560355611-56057397 | 1787  | chr10:48864789..48866575 forward | 1787               | 1287  | 1287 | 10 | (GAA) <sub>2</sub> A (TG) <sub>2</sub> TA (GT) <sub>2</sub> T (GTT) <sub>2</sub> | Interrupted complex  | Exon 1            | GACCATTTGGAGCAACAATG<br>GCTCCCTTAGGTCAACCAC       | nd    | nd | 187 |
| 44 | EIN2 targeting protein 1 (ETP2)                         | HRO_ETP2_2     | PGSC0003<br>DMG400029921 | PGSC0003<br>DMT400053922 | PGSC0003<br>DMT400053922 | 10.40868395-40869651  | 1257  | chr10:2181386..21826462 forward  | 1257               | 1257  | 1257 | 10 | (GAG) <sub>2</sub> CTAATT<br>(CA) <sub>2</sub> TGGA (TCC) <sub>2</sub>           | Interrupted complex  | Exon 1            | CATCTGAAATAGCAGCCAAATG<br>CCAATTCGGTATTCAGAGAA    | nd    | nd | 202 |
| 45 | EIN3-binding F-box protein 1 (EBF1)                     | HRO_EBF1_1a    | PGSC0003<br>DMG40003928  | PGSC0003<br>DMT400079445 | PGSC0003<br>DMT400079445 | 7.46222738-4626267    | 3530  | chr07:3655635..3660164 forward   | 3530               | 2579  | 1929 | 7  | (CT) <sub>2</sub> T (CAA) <sub>2</sub>                                           | Interrupted compound | Exon 2            | AGGCTGTGCACCTCTTTCAC<br>ATGTGGCTTTGTGGATGCG       | 55    | 36 | 177 |
| 46 | EIN3-binding F-box protein 1 (EBF1)                     | HRO_EBF1_2     | PGSC0003<br>DMG40002914  | PGSC0003<br>DMT400007545 | PGSC0003<br>DMT400007545 | 12.2844416-2848113    | 3698  | chr12:2844416..2848113 reverse   | 3698               | 2821  | 1914 | 12 | (AT) <sub>2</sub> (TGT)GA (TGT) <sub>2</sub>                                     | Interrupted complex  | 3'-UTR            | GGCCAAACCCTAGATAAAC<br>CTCATGTCTCCCTCGAAGAC       | 55    | 38 | 181 |
| 47 | Ethylene insensitive 2 (EIN2)                           | HRO_EIN2_1A    | PGSC0003<br>DMG40005147  | PGSC0003<br>DMT400055484 | PGSC0003<br>DMT400055484 | 9.5550240-5558623     | 8384  | chr09:4040363..4048746 forward   | 8384               | 6202  | 3906 | 9  | (TC) <sub>2</sub> (AT) <sub>2</sub> (GT) <sub>2</sub>                            | Complex              | Intron 4          | AGAGTGCATTCGATTAAGA<br>TTACAGATCTGCCCTCGTTC       | 55    | 36 | 183 |
| 48 | Ethylene insensitive 3 (EIN3)                           | HRO_EIN3_1A    | PGSC0003<br>DMG40005914  | PGSC0003<br>DMT400015145 | PGSC0003<br>DMT400015145 | 6.54305277-54308543   | 3267  | chr06:49634616..49637882 forward | 3267               | 1800  | 1800 | 6  | (TA) <sub>2</sub> (AT) <sub>2</sub>                                              | Compound             | 5'-UTR            | TGTGCTTTTGTCTAAAGATTTGG<br>CCCAACAGAGAATCTGAA     | nd    | nd | 202 |
| 49 | Ethylene insensitive 4 (EIN4)                           | HRO_EIN4_1     | PGSC0003<br>DMG400023402 | PGSC0003<br>DMT400006160 | PGSC0003<br>DMT400006160 | 5.50783752-50787902   | 4150  | chr05:59809871..59813239 reverse | 3369 (without UTR) | 3369  | 2292 | 5  | (TGA) <sub>2</sub> (AG) <sub>2</sub> G (GT) <sub>2</sub>                         | Interrupted complex  | Exon 1            | GGTGTGTTTGTGGGATTC<br>CCCATTTGATGGAACATCA         | nd    | nd | 225 |
| 50 | Ethylene insensitive 5 (EIN5)                           | HRO_EIN5_1     | PGSC0003<br>DMG40003725  | PGSC0003<br>DMT400009550 | PGSC0003<br>DMT400009550 | 4.70688095-70702726   | 14632 | chr04:62819357..62833988 forward | 14632              | 14121 | 3300 | 4  | (TG) <sub>2</sub> (TGA) <sub>2</sub> ATG (AT) <sub>2</sub>                       | Interrupted complex  | Exon 19           | TGCAGAAATGTCGAAAGATGA<br>GCTGCTTACAGGCAATCA       | nd    | nd | 219 |
| 51 | Ethylene insensitive-like 1 (EIL1)                      | HRO_EIL1_1     | PGSC0003<br>DMG400005915 | PGSC0003<br>DMT400015148 | PGSC0003<br>DMT400015148 | 6.54292149-54295237   | 3089  | chr06:49647922..49651010 forward | 3089               | 1833  | 1833 | 6  | (TG) <sub>2</sub> TGT (GAT) <sub>2</sub> (TA) <sub>2</sub>                       | Interrupted complex  | Exon 1            | GCTGAAGGAATGGAGAGTGG<br>GTGTTTGTTCAGGATCGACA      | nd    | nd | 197 |
| 52 | Ethylene insensitive-like 2 (EIL2)                      | HRO_EIL2_1     | PGSC0003<br>DMG40002712  | PGSC0003<br>DMT40002712  | PGSC0003<br>DMT40002712  | 1.6142379-6144661     | 4083  | chr01:5271439..5275521 reverse   | 4083               | 1845  | 1845 | 1  | (ACCCCTC) <sub>2</sub> (CT) <sub>2</sub>                                         | Compound             | 5'-UTR            | GGCACCAGATGTTGGGAGA<br>AATTTGACAGCCCACTGATC       | 55    | 36 | 132 |
| 53 | Ethylene-inducing xylanase (EIX)                        | HRO_EIX_1A     | PGSC0003<br>DMG400028786 | PGSC0003<br>DMT400020366 | PGSC0003<br>DMT400020366 | 12.1808690-1811450    | 2761  | chr12:1808690..1810952 reverse   | 2263               | 1737  | 1737 | 12 | (GTT) <sub>2</sub> (TTC) <sub>2</sub> (GT) <sub>2</sub>                          | Complex              | Exon 1            | CGATCATTTGCATGAGGACA<br>CGGATCATTTGCATGAGGACA     | nd    | nd | 153 |
| 54 | Ethylene-inducing xylanase (EIX)                        | HRO_EIX_1B     | PGSC0003<br>DMG400028786 | PGSC0003<br>DMT400020366 | PGSC0003<br>DMT400020366 | 12.1808690-1811450    | 2761  | chr12:1808690..1810952 reverse   | 2263               | 1737  | 1737 | 12 | (CT) <sub>2</sub> TT (GCT) <sub>2</sub> TGA (AT) <sub>2</sub>                    | Interrupted complex  | Exon 1            | GAAGACGCTTATTGGGAAA<br>GAGGTTCTCGGAAAACATGG       | nd    | nd | 108 |
| 55 | Ethylene-inducing xylanase (EIX)                        | HRO_EIX_1D     | PGSC0003<br>DMG400028786 | PGSC0003<br>DMT400020366 | PGSC0003<br>DMT400020366 | 12.1808690-1811450    | 2761  | chr12:1808690..1810952 reverse   | 2263               | 1737  | 1737 | 12 | (ATT) <sub>2</sub> A (AT) <sub>2</sub> G (TA) <sub>2</sub>                       | Interrupted complex  | Intergenic region | TACTCAGAGCCGGAGCTAGG<br>AGACAGAGCCGGAGCTAAGA      | nd    | nd | 194 |
| 56 | Ethylene-inducing xylanase (EIX)                        | HRO_EIX_1D2    | PGSC0003<br>DMG400028786 | PGSC0003<br>DMT400020366 | PGSC0003<br>DMT400020366 | 12.1808690-1811450    | 2761  | chr12:1808690..1810952 reverse   | 2263               | 1737  | 1737 | 12 | (ATT) <sub>2</sub> A (AT) <sub>2</sub> G (TA) <sub>2</sub>                       | Interrupted complex  | Intergenic region | TCTTACTCAGAGCCGGAGC<br>GGCCGAGCTAAGATTAGAG        | nd    | nd | 191 |
| 57 | Ethylene-inducing xylanase (EIX)                        | HRO_EIX_1E     | PGSC0003<br>DMG400028786 | PGSC0003<br>DMT400020366 | PGSC0003<br>DMT400020366 | 12.1808690-1811450    | 2761  | chr12:1808690..1810952 reverse   | 2263               | 1737  | 1737 | 12 | (GT) <sub>2</sub> GGG (CA) <sub>2</sub>                                          | Interrupted compound | Intergenic region | TCTTACTCAGCCCTCTCTGT<br>TTGCTTTTGTTCATTTGAGGA     | 57    | 32 | 149 |
| 58 | Ent-kaurene acid oxidase (KAO)                          | HRO_EKAO       | PGSC0003<br>DMG40001823  | PGSC0003<br>DMT400004596 | PGSC0003<br>DMT400004596 | 1.67908155-67912635   | 4481  | chr01:74093222..74097702 reverse | 4481               | 4186  | 1484 | 1  | (TA) <sub>2</sub>                                                                | Pure                 | Intron 1          | GAAGCATTTGCTTCTTATTGATG<br>CACACATTTGGGTGAAAAA    | nd    | nd | 215 |
| 59 | Ethylene overreduction protein 1 (ETO1)                 | HRO_ETOP1_3    | PGSC0003<br>DMG400015898 | PGSC0003<br>DMT400041081 | PGSC0003<br>DMT400041081 | 10.9469723-49692818   | 4896  | chr10:4223573..42238488 reverse  | 4896               | 4071  | 2494 | 10 | (AT) <sub>2</sub> CATAAT (CCT) <sub>2</sub>                                      | Interrupted compound | Exon 1            | TATCTTCTTCCCAATGTC<br>CGAGGAGATTTTGGTGTTC         | 55    | 33 | 189 |
| 60 | Ethylene receptor homolog (ETR homolog)                 | HRO_ETRHOM_2A  | PGSC0003<br>DMG40002694  | PGSC0003<br>DMT400073847 | PGSC0003<br>DMT400073847 | 11.6479282-6486765    | 7484  | chr11:277585..285068 forward     | 7484               | 5297  | 2304 | 11 | (GT) <sub>2</sub> A (TG) <sub>2</sub>                                            | Interrupted compound | 5'-UTR            | TTTTGGGTTTCTGTGGTTC<br>AACCCTTCTGCAAGATTC         | 55    | 36 | 127 |
| 61 | Ethylene response 1 (ETR1)                              | HRO_ETR1_1A    | PGSC0003<br>DMG40002843  | PGSC0003<br>DMT400020285 | PGSC0003<br>DMT400020285 | 12.111718-1121848     | 10131 | chr12:111718..1121848 reverse    | 10131              | 9594  | 2265 | 12 | (ATA) <sub>2</sub> AAA (ATA) <sub>2</sub>                                        | Interrupted pure     | Intron 6          | CGAGCATCTGGTACCATC<br>CTCTGTGTGATCGTCTTTC         | 55    | 36 | 180 |
| 62 | Ethylene response 2 (ETR2)                              | HRO_ETR2_1     | PGSC0003<br>DMG40001284  | PGSC0003<br>DMT400041983 | PGSC0003<br>DMT400041983 | 6.39789897-39794657   | 4761  | chr06:35141052..35145812 forward | 4761               | 2834  | 2286 | 6  | (CT) <sub>2</sub> AGTTT (GTG) <sub>2</sub> GTC (GGGGT) <sub>2</sub>              | Interrupted complex  | 5'-UTR            | GGGTTGCAATAGGGAATG<br>CCCTTCACTGATGGTATG          | nd    | nd | 201 |
| 63 | Ethylene response factor 114 (ERF114 = ERF80)           | HRO_ERF114_1   | PGSC0003<br>DMG40004240  | PGSC0003<br>DMT400036934 | PGSC0003<br>DMT400036934 | 3.57769896-37771196   | 2211  | chr03:43459012..43461222 reverse | 2211               | 1454  | 831  | 3  | (CTT) <sub>2</sub> CAT (CTT) <sub>2</sub>                                        | Interrupted pure     | Exon 2            | TTTGGGCTCCACCTTGA<br>TGAATTTGATGCTCCACA           | 55    | 38 | 211 |
| 64 | Ethylene response factor 12 (ERF12)                     | HRO_ERF12_1    | PGSC0003<br>DMG40002350  | PGSC0003<br>DMT400006041 | PGSC0003<br>DMT400006041 | 6.38128095-38130080   | 1986  | chr06:33905984..33907969 reverse | 1986               | 1125  | 1125 | 6  | (TCAT) <sub>2</sub> (CA) <sub>2</sub> AAG (AAC) <sub>2</sub>                     | Interrupted complex  | 5'-UTR            | AACCAAGGGTGTGATCTCA<br>GGCTTAAAAGGCTGATGGT        | nd    | nd | 209 |
| 65 | Ethylene response factor 141 (ERF141)                   | HRO_ERF141     | PGSC0003<br>DMG400028853 | PGSC0003<br>DMT400074248 | PGSC0003<br>DMT400074248 | 12.53036109-53038939  | 2831  | chr12:53036109..53047672 reverse | 2831               | 2339  | 1167 | 12 | (GA) <sub>2</sub> (TTTTTA) <sub>2</sub>                                          | Compound             | Intron 1          | TGCCCAATGAACAACATGCG<br>CCTTTGCTTCTGCTCTGCT       | 55    | 38 | 199 |
| 66 | Ethylene response factor 185 (ERF185)                   | HRO_ERF185_1   | PGSC0003<br>DMG400203892 | PGSC0003<br>DMT400036072 | PGSC0003<br>DMT400036072 | 12.6424457-6432746    | 8289  | chr12:6424457..6432746 forward   | 6639               | 6639  | 603  | 12 | (AG) <sub>2</sub> (TTC) <sub>2</sub> (GAA) <sub>2</sub><br>(GAAAAA) <sub>2</sub> | Complex              | Intron 3          | AGAAAATAGGGTGGGATG<br>TTTGAACACCCCATCTTAC         | nd    | nd | 181 |
| 67 | Ethylene response factor 4 (ERF)                        | HRO_ERF4_1     | PGSC0003<br>DMG400016094 | PGSC0003<br>DMT400011228 | PGSC0003<br>DMT400011228 | 5.47293160-47294004   | 845   | chr05:56538102..56538946 reverse | 845                | 621   | 621  | 5  | (TAA) <sub>2</sub> (GAA) <sub>2</sub> TTAC (AG) <sub>2</sub>                     | Interrupted complex  | Exon 1            | CAATCTCAGACGAGGATTC<br>TACCAACCAAAATCTCGAT        | 53    | 34 | 197 |
| 68 | Ethylene response sensor 1 (ERS 1)                      | HRO_ERS1_1     | PGSC0003<br>DMG400031819 | PGSC0003<br>DMT400081399 | PGSC0003<br>DMT400081399 | 9.5292466-52930013    | 7548  | chr09:44810065..44817612 reverse | 7548               | 4323  | 1908 | 9  | (GCA) <sub>2</sub> (GC) <sub>2</sub>                                             | Compound             | Intergenic region | CAGGACACAGGAGAGAAC<br>TTGATATCTCCCTCGAACC         | 55    | 36 | 190 |
| 69 | Ethylene response factor 1 (ERF1)                       | HRO_ERF1       | PGSC0003<br>DMG400026136 | PGSC0003<br>DMT400067218 | PGSC0003<br>DMT400067218 | 6.45876182-45877959   | 1778  | chr06:44645977..44647754 reverse | 1778               | 1267  | 591  | 6  | (TAA) <sub>2</sub> TGAA (AT) <sub>2</sub> (GT) <sub>2</sub>                      | Interrupted complex  | Intron 1          | CGAATTCGCCATCATTCAC<br>AGATCCCGCTTAAAGTGTTC       | nd    | nd | 183 |
| 70 | Ethylene responsive element binding protein 1 (EREBP1)  | HRO_EREBP1_1   | PGSC0003<br>DMG400076408 | PGSC0003<br>DMT400076408 | PGSC0003<br>DMT400076408 | 2.33632854-33633640   | 787   | chr02:54888224..54889010 reverse | 787                | 462   | 462  | 2  | (GTGT) <sub>2</sub> (GTTT) <sub>2</sub> (GT) <sub>2</sub> (TG) <sub>2</sub>      | Complex              | 5'-UTR            | TCTCTGTATGACCTTACCG<br>CGCAGATTAACGGGTGTC         | 57    | 36 | 200 |
| 71 | Ethylene responsive element binding protein 1 (EREBP1)  | HRO_EREBP1_1a  | PGSC0003<br>DMG40001067  | PGSC0003<br>DMT400002750 | PGSC0003<br>DMT400002750 | 12.4920261-4924764    | 4386  | chr12:4913744..4920947 reverse   | 7204               | 6550  | 675  | 12 | (CTT) <sub>2</sub> (TC) <sub>2</sub> CCC (CTG) <sub>2</sub>                      | Interrupted complex  | Intron 1          | CCTGAAGTTTCAGTGTCTCAGG<br>AGAAATAGGCTGCTGAGGAA    | 55    | 36 | 178 |
| 72 | Ethylene responsive element binding protein C2 (EREBP2) | HRO_EREBP2_1   | PGSC0003<br>DMG400016093 | PGSC0003<br>DMT400011227 | PGSC0003<br>DMT400011227 | 5.47308711-47310174   | 1464  | chr05:56553653..56555116 reverse | 1464               | 891   | 891  | 5  | (GTTG) <sub>2</sub> AA (TAT) <sub>2</sub> GAAA (GAAAT) <sub>2</sub>              | Interrupted complex  | 5'-UTR            | TCCATGAAAACAACATCATCA<br>GCTCAGAGAACCTCGATTG      | 55    | 36 | 202 |
| 73 | Ethylene responsive transcription factor (ETRTE)        | HRO_ETRTE_5a   | PGSC0003<br>DMG40002185  | PGSC0003<br>DMT400055585 | PGSC0003<br>DMT400055585 | 11.18921453-18922659  | 1207  | chr11:18766243..18767449 forward | 1207               | 1207  | 873  | 11 | (ACCA) <sub>2</sub> (AAC) <sub>2</sub>                                           | Compound             | Exon 1            | CACGTTCCATCGGTGTAA<br>AATCAGCTTAGGACGAGGA         | 55    | 36 | 198 |
| 74 | Ethylene responsive transcription factor 3 (ETRTE3)     | HRO_ETRTE3_2   | PGSC0003<br>DMG400014417 | PGSC0003<br>DMT400037359 | PGSC0003<br>DMT400037359 | 10.1121218-1122800    | 1583  | chr10:314882..316464 forward     | 1583               | 672   | 672  | 10 | (CGG) <sub>2</sub>                                                               | Pure                 | Exon 1            | GGTCATGAGGAGGGCAGAG<br>CCAAACCTAGTTTCTTCCCA       | 55    | 36 | 169 |
| 75 | Ethylene responsive transcription factor 3 (ETRTE3)     | HRO_ETRTE3_3   | PGSC0003<br>DMG400023205 | PGSC0003<br>DMT400057443 | PGSC0003<br>DMT400057443 | 7.55079184-55080640   | 1457  | chr07:53080191..53081647 reverse | 1457               | 723   | 723  | 7  | (GCC) <sub>2</sub> CCC (GCA) <sub>2</sub>                                        | Compound             | Exon 1            | CAGGACACACCCCATAGTTTC<br>TCCACAGCTGCTATGGATTC     | nd    | nd | 173 |
| 76 | Ethylene responsive transcription factor 7 (ETRTE7)     | HRO_ETRTE7_1   | PGSC0003<br>DMG401013892 | PGSC0003<br>DMT400036071 | PGSC0003<br>DMT400036071 | 12.6424671-6425243    | 573   | chr12:6336051..6336623 forward   | 573                | 573   | 573  | 12 | (TCG) <sub>2</sub> (TCT) <sub>2</sub> (GTG) <sub>2</sub>                         | Complex              | Exon 1            | AAATCTCCCGGGATTC<br>AGAAACAACAAGGGCAATG           | nd    | nd | 189 |
| 77 | Ethylene responsive transcription factor 13 (ETRTE13)   | HRO_ETRTE13_1A | PGSC0003<br>DMG400026046 | PGSC0003<br>DMT400067013 | PGSC0003<br>DMT400067013 | 1.69601395-69602081   | 687   | chr01:75714462..75742148 forward | 687 (without UTR)  | 687   | 687  | 1  | (CTT) <sub>2</sub> (CTC) <sub>2</sub>                                            | Compound             | Intron 1          | TAGATGAGCCGAGGAGGAC<br>GACCATCAAATGTTTACCG        | 55    | 31 | 185 |

|     |                                                                  |                          |                          |                          |                          |                      |       |                          |         |                    |      |      |    |                                                                                     |                      |                   |                                                    |       |    |     |
|-----|------------------------------------------------------------------|--------------------------|--------------------------|--------------------------|--------------------------|----------------------|-------|--------------------------|---------|--------------------|------|------|----|-------------------------------------------------------------------------------------|----------------------|-------------------|----------------------------------------------------|-------|----|-----|
| 84  | Gibberellin 3-oxidase (GaoX)                                     | HRO_G3O_1                | PGSC0003<br>DMG400016516 | PGSC0003<br>DMT400042582 | PGSC0003<br>DMT400042582 | 6:49523127-49525846  | 2720  | chr06:43045522..43048241 | forward | 2720               | 2552 | 1119 | 6  | (ACC) <sub>2</sub> (AAT) <sub>1</sub>                                               | Compound             | Exon 1            | CATGATGGACATCATCAA<br>TGAATGCCACCCATTCTT           | 55    | 36 | 152 |
| 85  | Glucosyltransferase (GT)                                         | HRO_GLUCT_7              | PGSC0003<br>DMG40008138  | PGSC0003<br>DMT400021019 | PGSC0003<br>DMT400021019 | 10:58444348-58445769 | 1422  | chr10:44471577..44472998 | reverse | 1422 (without UTR) | 1422 | 1422 | 10 | (AC) <sub>2</sub> (AT) <sub>1</sub> TACCGA<br>(GTTT)                                | Interrupted complex  | Exon 1            | TCCTGGAGCCAAAGAAA<br>CACCATCAACCCGTGATTGC          | nd    | nd | 155 |
| 86  | Glucosyltransferase (GT)                                         | HRO_GLUCT_7B             | PGSC0003<br>DMG40008138  | PGSC0003<br>DMT400021019 | PGSC0003<br>DMT400021019 | 10:58444348-58445769 | 1422  | chr10:44471577..44472998 | reverse | 1422 (without UTR) | 1422 | 1422 | 10 | (TGA) <sub>2</sub> GCCTC(GA) <sub>2</sub><br>GGTG(GA) <sub>2</sub>                  | Interrupted complex  | Exon 1            | AGCTGTGACGAGTTCAGG<br>TGGTATTGGTCCATCTCA           | nd    | nd | 158 |
| 87  | Glucosyltransferase (GT)                                         | HRO_GLUCT_7C             | PGSC0003<br>DMG40008138  | PGSC0003<br>DMT400021019 | PGSC0003<br>DMT400021019 | 10:58444348-58445769 | 1422  | chr10:44471577..44472998 | reverse | 1422 (without UTR) | 1422 | 1422 | 10 | (TC) <sub>2</sub> TGTT(TC) <sub>1</sub>                                             | Interrupted pure     | Intergenic region | TGTTCCCAAAAATCATAGCTT<br>CGGCCAATGTTGTTGTGATT      | 55    | 36 | 214 |
| 88  | Glutathione reductase (GR)                                       | HRO_GR_1                 | PGSC0003<br>DMT400019491 | PGSC0003<br>DMT400019491 | PGSC0003<br>DMT400019491 | 9:4883089-48837646   | 6958  | chr09:41364863..41371820 | reverse | 6958               | 4677 | 1671 | 9  | (CA) <sub>2</sub> (TG) <sub>2</sub> (GA) <sub>2</sub>                               | Complex              | Exon 8            | AAGCTACTCTTCTGGCTGC<br>TCAATCGAAATATCCACAAA        | nd    | nd | 159 |
| 89  | Glutathione reductase (GR)                                       | HRO_GR_2                 | PGSC0003<br>DMG400019491 | PGSC0003<br>DMT400019491 | PGSC0003<br>DMT400019491 | 9:4883089-48837646   | 6958  | chr09:41364863..41371820 | reverse | 6958               | 4677 | 1671 | 9  | (TTCC) <sub>2</sub> T(CTT) <sub>1</sub>                                             | Interrupted compound | Intron 9          | TCAGTAAACTGAAGCTGAACC<br>TTGAAGTTCCACAGAAGTGA      | nd    | nd | 196 |
| 90  | Glutathione-S-Transferase (GST)                                  | HRO_GLUTST_1A            | PGSC0003<br>DMG40004539  | PGSC0003<br>DMT40004539  | PGSC0003<br>DMT40004541  | 1:67558231-67567291  | 9061  | chr01:73745245..73752358 | reverse | 7114               | 6481 | 675  | 1  | (AT) <sub>2</sub> G(TA) <sub>2</sub>                                                | Interrupted compound | Intron 1          | TAGTGGGGTTCGTGAGTTT<br>ATTTTCATGGCCCTTCTCT         | 55    | 36 | 153 |
| 91  | Glutathione-S-Transferase (GST)                                  | HRO_GLUTST_1B            | PGSC0003<br>DMG40004539  | PGSC0003<br>DMT40004539  | PGSC0003<br>DMT40004541  | 1:67558231-67567291  | 9061  | chr01:73745245..73752358 | reverse | 7114               | 6481 | 675  | 1  | (ACA) <sub>2</sub> (GT) <sub>1</sub>                                                | Compound             | Intron 1          | AAGTAAAGTGTGTTGATTTGGA<br>TGAAGAAAGCAAGCAACCA      | nd    | nd | 125 |
| 92  | Glutathione-S-Transferase (GST)                                  | HRO_GLUTST_1C            | PGSC0003<br>DMG40004539  | PGSC0003<br>DMT40004539  | PGSC0003<br>DMT40004541  | 1:67558231-67567291  | 9061  | chr01:73745245..73752358 | reverse | 7114               | 6481 | 675  | 1  | (GT) <sub>1</sub> AT(TAG) <sub>2</sub>                                              | Interrupted compound | Intron 1          | GACATATTAATAGGAAATATTTGA<br>CATCGAAGAAAAGTATACCA   | 55    | 36 | 131 |
| 93  | Jasmonic acid 2 (JA2)                                            | HRO_JA2_1                | PGSC0003<br>DMG400015342 | PGSC0003<br>DMT400039670 | PGSC0003<br>DMT400039670 | 12:822922-825609     | 2688  | chr12:822922..825609     | forward | 2688               | 2209 | 1056 | 12 | (TA) <sub>2</sub> GT(TG) <sub>2</sub> (TAA) <sub>2</sub> AA<br>(TGA) <sub>1</sub>   | Interrupted complex  | Intron 1          | TGGATGGATTCATATAAAGTCA<br>GCTTAGCATCCGAGCAACTC     | 55    | 36 | 223 |
| 94  | JERF1 Transcription factor                                       | HRO_JERF1_1              | PGSC0003<br>DMG40004898  | PGSC0003<br>DMT400012547 | PGSC0003<br>DMT400012547 | 6:48380518-48383025  | 2508  | chr06:41800450..41802997 | reverse | 2508               | 2147 | 1119 | 6  | (CT) <sub>2</sub> GG(TTC) <sub>2</sub> (GAT) <sub>2</sub>                           | Interrupted complex  | Exon 2            | GGCTTTGAATCCAGATGA<br>GCAAGGAGAGACTTTATGCG         | nd    | nd | 189 |
| 95  | Kinase (KIN)                                                     | HRO_KIN_1                | PGSC0003<br>DMG400016429 | PGSC0003<br>DMT400042362 | PGSC0003<br>DMT400042362 | 1:3617273-3617745    | 473   | chr01:3120808..3121280   | forward | 473                | 180  | 180  | 1  | (TC) <sub>2</sub> AAGC(AT) <sub>1</sub>                                             | Interrupted compound | 3'-UTR            | CACAGTCTTTTACCAGATGC<br>GCTCGATAACGATGAAGCTCC      | 55    | 36 | 132 |
| 96  | Kinase (KIN)                                                     | HRO_KIN_1B               | PGSC0003<br>DMG400016429 | PGSC0003<br>DMT400042362 | PGSC0003<br>DMT400042362 | 1:3617273-3617745    | 473   | chr01:3120808..3121280   | forward | 473                | 180  | 180  | 1  | (AAGA) <sub>2</sub> TGA(AG) <sub>2</sub> TTG<br>(CCT) <sub>1</sub>                  | Interrupted complex  | Exon 1            | GATCCCAAGCTTACGTCAT<br>GTTCGCAATCGAAGCAAT          | nd    | nd | 172 |
| 97  | Late embryogenesis abundant protein 5 (LEA5)                     | HRO_LEA5_1               | PGSC0003<br>DMG400046207 | PGSC0003<br>DMT400046207 | PGSC0003<br>DMT400046207 | 6:461908-463086      | 1179  | chr06:3213972..3215150   | forward | 1179               | 629  | 270  | 6  | (TA) <sub>2</sub> A(TA) <sub>2</sub> A(TA) <sub>2</sub>                             | Interrupted pure     | 5'-UTR            | AAATACCTCTCTCCACACTTTT<br>AATTACTCCCGAGCAACAA      | 54    | 36 | 142 |
| 98  | Lipoxygenase (LOX)                                               | HRO_LIPOX_1              | PGSC0003<br>DMG40003207  | PGSC0003<br>DMT400082023 | PGSC0003<br>DMT400082023 | 1:2151329-2152141    | 813   | chr01:1654864..1655676   | reverse | 813                | 453  | 453  | 1  | (TA) <sub>2</sub> (CTT) <sub>2</sub>                                                | Compound             | 3'-UTR            | TTGAGCCAGGCTCAAGC<br>TTATAGCATTTTCATTGATTTT        | nd    | nd | 155 |
| 99  | Lipoxygenase (LOX)                                               | HRO_LIPOX_1B             | PGSC0003<br>DMG40003207  | PGSC0003<br>DMT400082023 | PGSC0003<br>DMT400082023 | 1:2151329-2152141    | 813   | chr01:1654864..1655676   | reverse | 813                | 453  | 453  | 1  | (TC) <sub>2</sub> TA(CT) <sub>2</sub>                                               | Interrupted compound | 5'-UTR            | TTGTGGCCATTATTGGAAAG<br>CAAGTGAGCTCGAGGGTGA        | 60    | 32 | 135 |
| 100 | LRR receptor-like serine/threonine-protein kinase (LRR-STPK)     | HRO_LRRSTPK_1A           | PGSC0003<br>DMG400027968 | PGSC0003<br>DMT400071885 | PGSC0003<br>DMT400071885 | 4:6318594-63322913   | 4320  | chr04:55449855..55454174 | forward | 4320 (without UTR) | 4320 | 3852 | 4  | (TG) <sub>1</sub> A(TG) <sub>2</sub> (TA) <sub>2</sub>                              | Interrupted complex  | Exon 4            | ATCCCAAAGTGGTTCCTT<br>ATTCGCAAGTGGTTCCTT           | nd    | nd | 171 |
| 101 | LRR receptor-like serine/threonine-protein kinase (LRR-STPK)     | HRO_LRRSTPK_1B           | PGSC0003<br>DMG400027968 | PGSC0003<br>DMT400071885 | PGSC0003<br>DMT400071885 | 4:6318594-63322913   | 4320  | chr04:55449855..55454174 | forward | 4320 (without UTR) | 4320 | 3852 | 4  | (AAG) <sub>2</sub> TTGA(AAG) <sub>2</sub> G<br>(GATGGT) <sub>2</sub>                | Interrupted complex  | Exon 2            | TGCTGTGTTTTCATTGGTG<br>TCTGTGGCTTTAAGTGCC          | nd    | nd | 145 |
| 102 | LRR receptor-like serine/threonine-protein kinase (LRR-STPK)     | HRO_LRRSTPK_1C           | PGSC0003<br>DMG400027968 | PGSC0003<br>DMT400071885 | PGSC0003<br>DMT400071885 | 4:6318594-63322913   | 4320  | chr04:55449855..55454174 | forward | 4320 (without UTR) | 4320 | 3852 | 4  | (AT) <sub>2</sub> (CATAT) <sub>2</sub> A<br>(ATATC) <sub>2</sub> (AT) <sub>2</sub>  | Interrupted complex  | Intergenic region | TCCTCGCTCAAGAAGCA<br>AAATGTGATATCATCTTTCTTCAA      | 57    | 36 | 203 |
| 103 | Molybdenum Cofactor sulfurase (MOCOS)                            | HRO_MOCOS_1A             | PGSC0003<br>DMG40002125  | PGSC0003<br>DMT400056893 | PGSC0003<br>DMT400056893 | 7:5651925-5652675    | 12751 | chr07:51633156..51649506 | forward | 12751              | 9838 | 1821 | 7  | (TCT) <sub>2</sub> G(CA) <sub>2</sub> ATT(AT) <sub>2</sub><br>TGGT(TG) <sub>2</sub> | Interrupted complex  | 5'-UTR            | GGCAGCCCTTGTATCTTCA<br>CAGAGCAAGGACGAGGAG          | 55/57 | 36 | 184 |
| 104 | Methionyl-tRNA synthetase (MetRS)                                | HRO_MTRNAS_1B            | PGSC0003<br>DMG400019113 | PGSC0003<br>DMT400049172 | PGSC0003<br>DMT400049172 | 5:48910277-4891779   | 7503  | chr05:58171816..58179318 | forward | 7503               | 4229 | 735  | 5  | (CT) <sub>2</sub> (TC) <sub>2</sub> CCTG(CT) <sub>2</sub>                           | Interrupted complex  | Intron 3          | TCCTTTTCTCTCTCTGTC<br>TCCAGCAGAGAGGACTACTG         | nd    | nd | 104 |
| 105 | Methionyl-tRNA synthetase (MetRS)                                | HRO_MTRNAS_1D            | PGSC0003<br>DMG400019113 | PGSC0003<br>DMT400049172 | PGSC0003<br>DMT400049172 | 5:48910277-4891779   | 7503  | chr05:58171816..58179318 | forward | 7503               | 4229 | 735  | 5  | (AT) <sub>2</sub> AC(AT) <sub>2</sub> (CT) <sub>2</sub>                             | Interrupted complex  | Intron 5          | CGACTTTTCAAGGCGAGTA<br>TTGGTCTAGCCACTAATGTA        | 57    | 36 | 131 |
| 106 | Multidrug resistance protein ABC transporter family (MRP)        | HRO_MRPFATF_3A           | PGSC0003<br>DMG400031714 | PGSC0003<br>DMT400031714 | PGSC0003<br>DMT400031714 | 8:55531912-55539184  | 7273  | chr08:42641417..42648689 | forward | 7273               | 3679 | 3249 | 8  | (GT) <sub>2</sub> TTTG(TA) <sub>2</sub> CATT<br>(TGA) <sub>2</sub>                  | Interrupted complex  | 5'-UTR            | CAGGATTTGAAGTTATGAGTTGG<br>CTTCCTTACGGATTACGA      | nd    | nd | 149 |
| 107 | Multidrug resistance protein ABC transporter family (MRP)        | HRO_MRPFATF_3B           | PGSC0003<br>DMG400031714 | PGSC0003<br>DMT400031714 | PGSC0003<br>DMT400031714 | 8:55531912-55539184  | 7273  | chr08:42641417..42648689 | forward | 7273               | 3679 | 3249 | 8  | (CA) <sub>2</sub> (CCT) <sub>2</sub> (AT) <sub>2</sub>                              | Complex              | Exon 4            | GATGATGACCAATTTGCTGGT<br>ATATCTTGGCCAAAGCAACG      | nd    | nd | 143 |
| 108 | Multidrug resistance protein ABC transporter family (MRP)        | HRO_MRPFATF_3D           | PGSC0003<br>DMG400031714 | PGSC0003<br>DMT400031714 | PGSC0003<br>DMT400031714 | 8:55531912-55539184  | 7273  | chr08:42641417..42648689 | forward | 7273               | 3679 | 3249 | 8  | (ATA) <sub>2</sub> TA(AT) <sub>2</sub> (GAT) <sub>2</sub>                           | Interrupted complex  | Intergenic region | TTTACATAGAGGCTCCCAT<br>CCATCTGTTTGGTAAACCA         | 55    | 32 | 163 |
| 109 | No apical meristem (NAM) (→RD 26, similar to NAM family protein) | HRO_NAM                  | PGSC0003<br>DMG400080307 | PGSC0003<br>DMT400080307 | PGSC0003<br>DMT400080307 | 5:4946134-4948792    | 2659  | chr05:4687504..4690162   | reverse | 2659               | 2548 | 1164 | 5  | (TA) <sub>2</sub> (TAT) <sub>2</sub> TT(ATAT) <sub>2</sub> TA<br>(GT) <sub>2</sub>  | Interrupted complex  | Intron 2          | CTTATTTGGGATTTCCCTATA<br>TGTGGATTTGGAGTTTGCTT      | nd    | nd | 166 |
| 110 | 9-cis-Epoxy-carotenoid dioxygenase (NCED)                        | HRO_NCED_1               | PGSC0003<br>DMG400071048 | PGSC0003<br>DMT400071048 | PGSC0003<br>DMT400071048 | 7:5177895-51781175   | 2281  | chr07:50086448..50088728 | forward | 2281               | 1521 | 1521 | 7  | (TAC) <sub>2</sub>                                                                  | Pure                 | 5'-UTR            | TCACCTCAAAGGAAACACAA<br>GATGCGATTGCAACTTAGG        | nd    | nd | 203 |
| 111 | 9-cis-Epoxy-carotenoid dioxygenase (NCED)                        | HRO_NCED_2               | PGSC0003<br>DMG400071048 | PGSC0003<br>DMT400071048 | PGSC0003<br>DMT400071048 | 7:5177895-51781175   | 2281  | chr07:50086448..50088728 | forward | 2281               | 1521 | 1521 | 7  | (GA) <sub>2</sub> G(TA) <sub>2</sub>                                                | Interrupted compound | 3'-UTR            | AGCTCACTGCTTTTCTGGC<br>GGTGGAATAGTATAAGCCATGA      | 57    | 36 | 145 |
| 112 | 9-cis-Epoxy-carotenoid dioxygenase (NCED)                        | HRO_NCED_3               | PGSC0003<br>DMG40004311  | PGSC0003<br>DMT400011006 | PGSC0003<br>DMT400011006 | 8:39185413-39188702  | 3290  | chr08:28315023..28318312 | forward | 3290 (without UTR) | 3290 | 1824 | 8  | (TA) <sub>2</sub> (TGTTT) <sub>2</sub> (CTT) <sub>2</sub>                           | Complex              | Intron 6          | TTGAAGTGGTGTGCTTTCAGG<br>TAAATGAGTAAAGTTGGTAAAAA   | 55    | 36 | 134 |
| 113 | Nucleoside diphosphate kinase 2 (NDPK)                           | HRO_NDPK2_1              | PGSC0003<br>DMG400062976 | PGSC0003<br>DMT400069352 | PGSC0003<br>DMT400069352 | 6:52807449-52811263  | 3815  | chr06:48478602..48482416 | forward | 3815               | 3307 | 675  | 6  | (AT) <sub>2</sub> (TTA) <sub>2</sub>                                                | Complex              | Intron 5          | AGGGTTTGGTGTGTTGCTC<br>TTGCCATCAGATCCATGAC         | 57    | 36 | 182 |
| 114 | Neutral invertase (NI)                                           | HRO_NEI_1                | PGSC0003<br>DMG400013088 | PGSC0003<br>DMT400034052 | PGSC0003<br>DMT400034052 | 1:37067233-37072498  | 5266  | chr01:18007260..18012525 | reverse | 5266               | 4689 | 2037 | 1  | (GT) <sub>2</sub> A(TG) <sub>2</sub>                                                | Interrupted compound | Intron 1          | CAAATGCTGTCAATGATGC<br>AAAGCTGCAATCTTCATGG         | nd    | nd | 143 |
| 115 | Neutral invertase (NI)                                           | HRO_NEI1_3               | PGSC0003<br>DMG400026530 | PGSC0003<br>DMT400068246 | PGSC0003<br>DMT400068246 | 11:39907597-39913829 | 6233  | chr11:37909122..37909632 | forward | 6231               | 4767 | 1926 | 11 | (AC) <sub>2</sub> (AT) <sub>2</sub>                                                 | Compound             | Intron 5          | GCTTTGGGCAAGTATAGCTT<br>TGCATTTATACACATACGAAAAACA  | nd    | nd | 169 |
| 116 | Poly (ADP-ribose) glycohydrolase (PARG)                          | HRO_PARGH_1A             | PGSC0003<br>DMG400029361 | PGSC0003<br>DMT400075512 | PGSC0003<br>DMT400075512 | 12:58212212-58218855 | 6644  | chr12:64844605..64851248 | forward | 6644               | 6078 | 1692 | 12 | (GA) <sub>2</sub> AA(GA) <sub>2</sub>                                               | Interrupted pure     | Intron 9          | GCCTAAAACACGATCGCACT<br>CGGAAAGATTTGGCTCATGT       | 55    | 36 | 135 |
| 117 | Poly (ADP-ribose) glycohydrolase (PARG)                          | HRO_PARGH_1C             | PGSC0003<br>DMG400029361 | PGSC0003<br>DMT400075512 | PGSC0003<br>DMT400075512 | 12:58212212-58218855 | 6644  | chr12:64844605..64851248 | forward | 6644               | 6078 | 1692 | 12 | (TA) <sub>2</sub> G(TA) <sub>2</sub>                                                | Interrupted pure     | Intron 2          | ATATGGCCAAACCAACACC<br>AGAGCTGGCAGTCTTCTTC         | 56    | 34 | 175 |
| 118 | Proline oxidase/ dehydrogenase 1 (PRODH, PDH)                    | HRO_POD1_2               | PGSC0003<br>DMG400010050 | PGSC0003<br>DMT400026049 | PGSC0003<br>DMT400026049 | 2:45033737-45033948  | 6212  | chr02:66292969..66295191 | forward | 2423               | 1813 | 1503 | 2  | (TG) <sub>2</sub> (AT) <sub>2</sub>                                                 | Compound             | Intron 2          | AAATAAATTTTCCGCTATGTCTAA<br>CAAATTTGGAGATTTGGCTTCT | 55    | 36 | 117 |
| 119 | Protein phosphatase 2c (PP2C)                                    | HRO_PP1_1 (HRO_PP2C)     | PGSC0003<br>DMG400011321 | PGSC0003<br>DMT400029441 | PGSC0003<br>DMT400029441 | 1:58016454-58020478  | 4025  | chr01:64271792..64275816 | forward | 4025               | 2194 | 1566 | 1  | (GAA) <sub>2</sub> A(AT) <sub>2</sub> CAT<br>(GAT) <sub>2</sub>                     | Interrupted complex  | Exon 3            | CCATTTTGCAATCTTGATGAGC<br>GATGCTTTTGGAGTGGCTT      | 55    | 36 | 182 |
| 120 | Protein phosphatase 2c (PP2C)                                    | HRO_PP1_2 (HRO_PP2C_1_2) | PGSC0003<br>DMG40002110  | PGSC0003<br>DMT400081763 | PGSC0003<br>DMT400081763 | 1:60945180-60952491  | 7312  | chr01:67200518..67207829 | reverse | 7312               | 6226 | 1245 | 1  | (GGT) <sub>2</sub> (GT) <sub>2</sub> (CT) <sub>2</sub>                              | Complex              | Intron 1          | CACCCAAAGTTGGAGAGCAT<br>TCCATATCTTCTGCTGTAACAGAC   | 55    | 36 | 149 |
| 121 | Protein phosphatase 2c (PP2C)                                    | HRO_PP1_3 (HRO_PP2C_1_3) | PGSC0003<br>DMG40002110  | PGSC0003<br>DMT400081763 | PGSC0003<br>DMT400081763 | 1:60945180-60952491  | 7312  | chr01:67200518..67207829 | reverse | 7312               | 6226 | 1245 | 1  | (GT) <sub>2</sub> CAG(TA) <sub>2</sub> T(GT) <sub>2</sub>                           | Interrupted complex  | Intron 1          | CTGGTGTGTCTCTCTG<br>GCATAGCTCCCAATAGGAAAA          |       |    |     |

|     |                                                      |               |                                    |                                    |                                    |                      |      |                                  |                    |      |      |        |                                                                              |                      |                   |                                                                 |    |    |     |
|-----|------------------------------------------------------|---------------|------------------------------------|------------------------------------|------------------------------------|----------------------|------|----------------------------------|--------------------|------|------|--------|------------------------------------------------------------------------------|----------------------|-------------------|-----------------------------------------------------------------|----|----|-----|
| 127 | Receptor protein kinase (RPK)                        | HRO_RPK_10D   | PGSC0003<br>DMG400017718           | PGSC0003<br>DMT40005689            | PGSC0003<br>DMT40005689            | 4:63083149-63086451  | 3303 | chr04:54069856..54071808 reverse | 1953 (without UTR) | 1953 | 1953 | 4      | (TC) <sub>2</sub> CCA (AT) <sub>2</sub> TTC (CA) <sub>2</sub>                | Interrupted complex  | Intergenic region | AGTTGGCGAGTTCTCTCTA<br>CAGTGAAGTCAATGTGGAGTG                    | 55 | 36 | 158 |
| 128 | Receptor protein kinase (RPK)                        | HRO_RPK_10E   | PGSC0003<br>DMG400017718           | PGSC0003<br>DMT40005689            | PGSC0003<br>DMT400045691           | 4:63083149-63086451  | 3303 | chr04:54068306..54070997 reverse | 2492               | 1138 | 1035 | 4      | (TG) <sub>1</sub> A (TG) <sub>2</sub> (TA) <sub>2</sub>                      | Interrupted complex  | Exon 2            | GGCTATGTCCACCTGGTAA<br>CCCAAGATGCTTCTCTTGA                      | nd | nd | 211 |
| 129 | SBT4B protein                                        | HRO_SBT4B_1   | PGSC0003<br>DMG400006840           | PGSC0003<br>DMT400017633           | PGSC0003<br>DMT400017634           | 1:65018707-65021313  | 2607 | chr01:71203774..71206380 reverse | 2607               | 1353 | 1353 | 1      | (TG) <sub>2</sub> GCC (TG) <sub>2</sub> (CA) <sub>1</sub>                    | Interrupted complex  | Exon 1            | ACAAGGCTCTGGAGGAAA<br>GAAATCGAGGCTCAGGAGTT                      | nd | nd | 157 |
| 130 | SBT4B protein                                        | HRO_SBT4B_1B  | PGSC0003<br>DMG400006840           | PGSC0003<br>DMT400017633           | PGSC0003<br>DMT400017634           | 1:65018707-65021313  | 2607 | chr01:71203774..71206380 reverse | 2607               | 1353 | 1353 | 1      | (AG) <sub>2</sub> G (TA) <sub>2</sub> T (GT) <sub>2</sub>                    | Interrupted complex  | 5'-UTR            | AAAGCATGAGGCTCCCTT<br>TTTTATCAAGCCCTACTCT                       | 55 | 36 | 101 |
| 131 | SCARECROW (SCR)                                      | HRO_SCRCRW    | PGSC0003<br>DMG400018833           | PGSC0003<br>DMT400043358           | PGSC0003<br>DMT400043358           | 10:48250273-48254623 | 4351 | chr10:39916234..39920584 reverse | 4351               | 3866 | 2481 | 10     | (CCT) <sub>2</sub> (GCT) <sub>2</sub> (GCA) <sub>2</sub>                     | Complex              | Exon 1            | TGCTATCTCCAGGAATGG<br>CAAATCTACCCCAAAATGAA<br>TCAGCTCTCCGATGTGG | nd | nd | 160 |
| 132 | Serine-threonine protein kinase (STPK)               | HRO_STPK      | PGSC0003<br>DMG40000652            | PGSC0003<br>DMT40001743            | PGSC0003<br>DMT40001743            | 12:42294180-42298253 | 4074 | chr01:71075826..71081106 forward | 5281 (without UTR) | 5281 | 2517 | 12     | (CT) <sub>2</sub> TTT (CT) <sub>2</sub> TT (CT) <sub>2</sub>                 | Interrupted pure     | 5'-UTR            | AGAGACGTACCCGATCAAT<br>ATATGGTTCGCCACTAAGC                      | 55 | 36 | 115 |
| 133 | Serine-threonine protein kinase (STPK), plant-type   | HRO_STPKPT_1A | PGSC0003<br>DMG400010951           | PGSC0003<br>DMT400028434           | PGSC0003<br>DMT400028434           | 00:31420301-31421237 | 937  | chr03:3517472..3518408 reverse   | 937                | 282  | 282  | 0 (3?) | (TG) <sub>2</sub> (TA) <sub>2</sub> AATCA (CT) <sub>2</sub>                  | Interrupted complex  | 5'-UTR            | TCCAACGATGCGCACAT<br>GGAATCTCTGAAAGTCA                          | 55 | 36 | 166 |
| 134 | Serine-threonine protein kinase (STPK), plant-type   | HRO_STPKPT_1B | PGSC0003<br>DMG400010951           | PGSC0003<br>DMT400028434           | PGSC0003<br>DMT400028434           | 00:31420301-31421237 | 937  | chr03:3517472..3518408 reverse   | 937                | 282  | 282  | 0 (3?) | (AGT) <sub>2</sub> (TG) <sub>2</sub>                                         | Compound             | 5'-UTR            | CAITTCATGAGCAATGGAT<br>TGCATGTGCGAGCAATGAC                      | 55 | 36 | 132 |
| 135 | S-locus-specific glycoprotein S6 (SLSG6)             | HRO_SLSP6_5A  | PGSC0003<br>DMG401013876           | PGSC0003<br>DMT400036026           | PGSC0003<br>DMT400036023           | 2:35398866-35403067  | 4202 | chr02:56654435..56658437 reverse | 4003               | 3337 | 2433 | 2      | (AT) <sub>2</sub> T (CA) <sub>2</sub>                                        | Interrupted compound | Exon 1            | CCAGTTCAGATGATGC<br>CCAGTTCAGTGGATGTT                           | nd | nd | 175 |
| 136 | S-locus-specific glycoprotein S6 (SLSG6)             | HRO_SLSP6_5B  | PGSC0003<br>DMG401013876           | PGSC0003<br>DMT400036026           | PGSC0003<br>DMT400036023           | 2:35398866-35403067  | 4202 | chr02:56654435..56658437 reverse | 4003               | 3337 | 2433 | 2      | (CA) <sub>2</sub> C (CA) <sub>2</sub> G (AAT) <sub>2</sub>                   | Interrupted complex  | Exon 1            | CAACGTTCAACCCAAAAG<br>GCAAGTTCGCCACCTAAGC                       | 55 | 36 | 183 |
| 137 | S-locus-specific glycoprotein S6 (SLSG6)             | HRO_SLSP6_5C  | PGSC0003<br>DMG401013876           | PGSC0003<br>DMT400036026           | PGSC0003<br>DMT400036023           | 2:35398866-35403067  | 4202 | chr02:56654435..56658437 reverse | 4003               | 3337 | 2433 | 2      | (ATA) <sub>2</sub> (AAT) <sub>2</sub> ACCT (TA) <sub>2</sub>                 | Interrupted complex  | Intergenic region | CAAGTTCACCCAAAAG<br>GCAAGTTCGCCACCTAAGC                         | 55 | 36 | 183 |
| 138 | Snakin-1 (SN-1)                                      | HRO_SNN_1     | PGSC0003<br>DMG400014441           | PGSC0003<br>DMT400037423           | PGSC0003<br>DMT400037423           | 12:49371055-49372039 | 985  | chr12:55666169..55667153 reverse | 985                | 801  | 267  | 12     | (AT) <sub>2</sub> AA (AT) <sub>2</sub>                                       | Interrupted compound | Intron 1          | CAGGTGGAGCTAAAGTTC<br>TGGCTAGTAAATGAAAGTGA                      | nd | nd | 200 |
| 139 | Soluble anorganin pyrophosphatase (siPase)           | HRO_SIPP_1    | PGSC0003<br>DMG400012223           | PGSC0003<br>DMT400031867           | PGSC0003<br>DMT400031867           | 8:56807414-56809327  | 1914 | chr08:41371274..41373187 reverse | 1914               | 1313 | 639  | 8      | (ATC) <sub>2</sub> AC (AT) <sub>2</sub>                                      | Interrupted compound | 5'-UTR            | GGAAAAGGAATCGGACA<br>GGCGTCTCTTGTTCATC                          | 55 | 36 | 206 |
| 140 | Superoxide dismutase (SOD)                           | HRO_SOD_1     | PGSC0003<br>DMG40005247            | PGSC0003<br>DMT400013447           | PGSC0003<br>DMT400013447           | 3:36657156-36660903  | 3748 | chr03:24127144..24130891 reverse | 3748               | 2672 | 912  | 3      | (GAA) <sub>2</sub> (GA) <sub>2</sub> (GGA) <sub>2</sub> A (GAG) <sub>2</sub> | Interrupted complex  | Exon 9            | TGAGAGCAGCTCAAGCTCA<br>TCGCTCTCGCAAAATGAC                       | nd | nd | 200 |
| 141 | Superoxide dismutase (SOD)                           | HRO_SOD_2     | PGSC0003<br>DMG400027577           | PGSC0003<br>DMT400070918           | PGSC0003<br>DMT400070920           | 6:35297776-35306389  | 8614 | chr06:31466066..31474679 reverse | 8614               | 7831 | 756  | 6      | (TA) <sub>2</sub> (TTT) <sub>2</sub> TG (AT) <sub>2</sub>                    | Interrupted complex  | Intron 8          | CGATTTGAGTTATGTGTCTGA<br>CCAAAATTTGCTCAATGGA                    | nd | nd | 196 |
| 142 | TIR-NBS-LRR disease resistance (TNL-DR)              | HRO_TNLDR_2A  | PGSC0003<br>DMG400027977           | PGSC0003<br>DMT400071445           | PGSC0003<br>DMT400071445           | 11:9730445-9736116   | 5672 | chr11:9172641..9178312 reverse   | 5672 (without UTR) | 5672 | 3195 | 11     | (AT) <sub>2</sub> AAA (TG) <sub>2</sub>                                      | Interrupted compound | Intron 2          | TGCAGGCTCTAAATACTATA<br>CAAAATCCCTCTCTGCAT                      | 50 | 36 | 164 |
| 143 | TIR-NBS-LRR disease resistance (TNL-DR)              | HRO_TNLDR_2B  | PGSC0003<br>DMG400027977           | PGSC0003<br>DMT400071445           | PGSC0003<br>DMT400071445           | 11:9730445-9736116   | 5672 | chr11:9172641..9178312 reverse   | 5672 (without UTR) | 5672 | 3195 | 11     | (GTA) <sub>2</sub> AAAC (TA) <sub>2</sub>                                    | Interrupted compound | Intron 1          | TTTAGCGAATACCTCTGGAT<br>GGAAAATGGAAAACATTTCTTG                  | nd | nd |     |
| 144 | TIR-NBS-LRR disease resistance (TNL-DR)              | HRO_TNLDR_2C  | PGSC0003<br>DMG400027977           | PGSC0003<br>DMT400071445           | PGSC0003<br>DMT400071445           | 11:9730445-9736116   | 5672 | chr11:9172641..9178312 reverse   | 5672 (without UTR) | 5672 | 3195 | 11     | (CAT) <sub>2</sub> (CT) <sub>2</sub> AA (AC) <sub>2</sub>                    | Interrupted complex  | Exon 1            | GTGAAATGCTCCGCTCTT<br>GAATTTAGGGGAAAAGATGTC                     | nd | nd | 122 |
| 145 | Trehalose-6-phosphate synthase 1 (TPS 1)             | HRO_TPS1_1    | PGSC0003<br>DMG400007089           | PGSC0003<br>DMT400018267           | PGSC0003<br>DMT400018267           | 7:52282758-52284752  | 1995 | chr07:49582871..49584865 forward | 1995               | 1418 | 804  | 7      | (TA) <sub>2</sub> (CA) <sub>2</sub>                                          | Compound             | Intron 3          | CCGAGCAGTGGTGTACAA<br>TTGGTGTTCGAATGGCTTA                       | 60 | 36 | 156 |
| 146 | UDP-glucose:glucosyltransferase (UGGT)               | HRO_UDPGT_1A  | PGSC0003<br>DMG400019093           | PGSC0003<br>DMT400049125           | PGSC0003<br>DMT400049125           | 00:38379277-38379630 | 354  | -                                | -                  | -    | -    | 0      | (TG) <sub>2</sub> ATT (GA) <sub>2</sub> T (TGG) <sub>2</sub>                 | Interrupted complex  | unknown           | TTGACAAATTCAGGGCTT<br>CCGAAAAGTATGCTGATTG                       | 55 | 36 | 141 |
| 147 | UDP-glucose:glucosyltransferase (UGGT)               | HRO_UDPGT_1B  | PGSC0003<br>DMG400019093 (SPUD DB) | PGSC0003<br>DMT400049125 (SPUD DB) | PGSC0003<br>DMT400049125 (SPUD DB) | 00:38379277-38379630 | 354  | -                                | -                  | -    | -    | 0      | (GA) <sub>2</sub> (TG) <sub>2</sub>                                          | Compound             | unknown           | TTTCTGATGGGATTTGAGA<br>TTCCATTTTGGCTTATGG                       | nd | nd | 123 |
| 148 | UTP-glucose-1-phosphate uridylyltransferase (UGPase) | HRO_UGP_1     | PGSC0003<br>DMG401013333           | PGSC0003<br>DMT400034699           | PGSC0003<br>DMT400034699           | 11:808268-814810     | 6543 | chr11:2402051..2408593 forward   | 6543               | 6248 | 1434 | 11     | (TA) <sub>2</sub> (GT) <sub>2</sub>                                          | Compound             | Intron 2          | GTGTGCGGCAAAAGTGA<br>TGATCTGCAAAAGCTGGATA                       | 57 | 36 | 177 |
| 150 | Vacuolar protein sorting protein (VPSP)              | HRO_VPSP_1A   | PGSC0003<br>DMG400003501 (SPUD DB) | PGSC0003<br>DMT400008982 (SPUD DB) | PGSC0003<br>DMT400008982 (SPUD DB) | 00:36520614-36528235 | 7622 | -                                | -                  | -    | -    | 0      | (AT) <sub>2</sub> GCT (TC) <sub>2</sub> (TG) <sub>2</sub>                    | Interrupted complex  | unknown           | TCCTTTTGGGAAAGCAT<br>AAAAATCCAGAATTCGAAGTGA                     | nd | nd | 151 |
| 149 | Vacuolar protein sorting protein (VPSP)              | HRO_VPSP_1B   | PGSC0003<br>DMG400003501 (SPUD DB) | PGSC0003<br>DMT400008982 (SPUD DB) | PGSC0003<br>DMT400008982 (SPUD DB) | 00:36520614-36528235 | 7622 | -                                | -                  | -    | -    | 0      | (TGG) <sub>2</sub> ACT (AT) <sub>2</sub> G (GA) <sub>2</sub>                 | Interrupted complex  | unknown           | TTTCTCTCGAAATTAAGA<br>TCTTCTCAGATCACTAGC                        | 60 | 32 | 157 |
| 151 | Vacuolar protein sorting protein (VPSP)              | HRO_VPSP_1C   | PGSC0003<br>DMG400003501 (SPUD DB) | PGSC0003<br>DMT400008982 (SPUD DB) | PGSC0003<br>DMT400008982 (SPUD DB) | 00:36520614-36528235 | 7622 | -                                | -                  | -    | -    | 0      | (GCT) <sub>2</sub> T (TA) <sub>2</sub>                                       | Interrupted compound | unknown           | TCCATTGTTCAGTAAGTCTGCT<br>TCTGGATCAAGATCACTAGC                  | nd | nd | 177 |
| 152 | Vacuolar protein sorting protein (VPSP)              | HRO_VPSP_1D   | PGSC0003<br>DMG400003501 (SPUD DB) | PGSC0003<br>DMT400008982 (SPUD DB) | PGSC0003<br>DMT400008982 (SPUD DB) | 00:36520614-36528235 | 7622 | -                                | -                  | -    | -    | 0      | (TC) <sub>2</sub> AC (TG) <sub>2</sub> A (CAA) <sub>2</sub>                  | Interrupted complex  | unknown           | TTCCAGGTAGATGAACATTGA<br>ACCCACCTAGTGGGATTC                     | nd | nd | 159 |
| 153 | WRKY transcription factor (WRKY TF)                  | HRO_WRKYTF_1B | PGSC0003<br>DMG40008188            | PGSC0003<br>DMT400021144           | PGSC0003<br>DMT400021144           | 8:34572458-34573154  | 697  | chr08:19161502..19162198 reverse | 697                | 523  | 387  | 8      | (TAC) <sub>2</sub> GCC (ATG) <sub>2</sub> (TA) <sub>2</sub>                  | Interrupted complex  | Intergenic region | CACAGATTCGACGGATTA<br>TTGGTGAAGTGTITTTGGTACG                    | 57 | 36 | 204 |
| 154 | Zeaxanthin epoxidase (ZEP)                           | HRO_ZE_1      | PGSC0003<br>DMG400004020           | PGSC0003<br>DMT400010287           | PGSC0003<br>DMT400010287           | 2:43804309-43810444  | 6136 | chr02:65059752..65065887 forward | 6136               | 5265 | 2010 | 2      | (CT) <sub>2</sub> ATG (TA) <sub>2</sub> CAA (TTA) <sub>2</sub>               | Interrupted complex  | 3'-UTR            | CCTGGAAGAAGTCAAGTCA<br>TAAGTCCAGGAGCAAAATG                      | 53 | 36 | 200 |

**Table S4** Overview of 19 AFLP primer combinations used in the UPGMA dendrogram (Figure S1)

| <b>E-Name</b> | <b>E-Primer</b> | <b>E-IRD</b> | <b>M-Name</b> | <b>M-Primer</b> |
|---------------|-----------------|--------------|---------------|-----------------|
| E32           | E-AAC           | 800          | M47           | M-CAA           |
| E32           | E-AAC           | 800          | M48           | M-CAC           |
| E32           | E-AAC           | 800          | M49           | M-CAG           |
| E32           | E-AAC           | 800          | M50           | M-CAT           |
| E32           | E-AAC           | 800          | M60           | M-CTC           |
| E32           | E-AAC           | 800          | M61           | M-CTG           |
| E32           | E-AAC           | 800          | M62           | M-CTT           |
| E33           | E-AAG           | 800          | M47           | M-CAA           |
| E33           | E-AAG           | 800          | M48           | M-CAC           |
| E33           | E-AAG           | 800          | M49           | M-CAG           |
| E33           | E-AAG           | 800          | M60           | M-CTC           |
| E33           | E-AAG           | 800          | M61           | M-CTG           |
| E33           | E-AAG           | 800          | M62           | M-CTT           |
| E35           | E-ACA           | 800          | M47           | M-CAA           |
| E35           | E-ACA           | 800          | M48           | M-CAC           |
| E35           | E-ACA           | 800          | M49           | M-CAG           |
| E35           | E-ACA           | 800          | M60           | M-CTC           |
| E35           | E-ACA           | 800          | M61           | M-CTG           |
| E35           | E-ACA           | 800          | M62           | M-CTT           |

**Table S5.** Linkage group specific SSR primer combinations

References: (1) Feingold et al., 2005 [45]; (2) Ghislain et al., 2009 [51]; (3) Milbourne et al., 1998 [47]; (4) Provan et al., 1996 [48]; (5) Veilleux et al., 1995 [50]; (6) unpublished from SCRI, 2009.

| LG | Primer      | Sequence in 5'-3'-direction | Reference | Gene ID/<br>Reference | SSR                                   | Expected<br>size in bp |
|----|-------------|-----------------------------|-----------|-----------------------|---------------------------------------|------------------------|
| 1  | STG0016for  | AgCTgCTCAgCATCAAgAgA        | (2)       | BI178934              | (AGA) <sub>n</sub>                    | 138                    |
|    | STG0016rev  | ACCACCTCAggCACTTCATC        |           |                       |                                       |                        |
| 1  | STI0031for  | AggCgCACTTTAACTTCCAC        | (1)       | (TC105688)            | (TCA) <sub>n</sub>                    | 138                    |
|    | STI0031rev  | CggAACAAATggCTCTgATg        |           |                       |                                       |                        |
| 1  | STI0034for  | CAAgAAACCAAgAgCAAATTTCA     | (1)       | (TC94397)             | (CTT) <sub>n</sub>                    | 158                    |
|    | STI0034rev  | TggCgAATgTgAgAAACAAA        |           |                       |                                       |                        |
| 1  | STI0043for  | CAATgCgAATgTTgCTACTggT      | (1)       | (TC95982)             | (AAC) <sub>n</sub>                    | 135                    |
|    | STI0043rev  | ATCCACCAAgACCTCCAgAA        |           |                       |                                       |                        |
| 1  | STMLeatpacA | ACTTACTCCCCTCCAACCTC        | (3)       | M96324                | (TA) <sub>n</sub>                     | 187                    |
|    | STMLeatpacA | CgTTTggTTACAAgAgAATTg       |           |                       |                                       |                        |
| 2  | STG0033for  | gCTCATTTgACTgCTAAACCC       | (2)       | BI935647              | (CGG) <sub>n</sub>                    | -                      |
|    | STG0033rev  | gAAAgAATTgTgCCgTCgAT        |           |                       |                                       |                        |
| 2  | STI0024for  | CgCCATTCTCTCAgATCACTC       | (1)       | (TC104888)            | (CAA) <sub>n</sub>                    | 168                    |
|    | STI0024rev  | gCtgCAgCAGTTgTTgTTgT        |           |                       |                                       |                        |
| 2  | STI0036for  | ggACTggCTgACCATgAACT        | (1)       | BI920053              | (AT) <sub>n</sub> (TC) <sub>imp</sub> | -                      |
|    | STI0036rev  | TTACAggAAATgCAAACCTCg       |           |                       |                                       |                        |
| 2  | STI0056for  | gACAgAgAATATgggACCACCA      | (1)       | (TC95818)             | (TA) <sub>n</sub>                     | 195                    |
|    | STI0056rev  | gCAgCACCTTAAATggCTgAC       |           |                       |                                       |                        |
| 2  | STM5114for  | AATggCTCTCTCTgTATgCT        | (6)       | [p102B19]             | (ACC) <sub>n</sub>                    | -                      |
|    | STM5114rev  | gCTgTCCCAACTATCTTTgA        |           |                       |                                       |                        |
| 3  | STG0010for  | CgATCTCTgCTTTgCAggTA        | (2)       | BM407152              | (TG) <sub>n</sub>                     | 175-192                |
|    | STG0010rev  | gTTCATCACTACCgCCgACT        |           |                       |                                       |                        |
| 3  | STG0018for  | ACCCgAATCCAAACCCCTAAC       | (2)       | BI920777              | (CAA) <sub>n</sub>                    | 134                    |
|    | STG0018rev  | AACCCgTgTCAACTTCTgCT        |           |                       |                                       |                        |
| 3  | STM1053for  | CTCCCCATCTTAATGTTTC         | (3)       | AB022690              | (TA) <sub>n</sub> (ATC) <sub>n</sub>  | 171                    |
|    | STM1053rev  | CAACACAGCATAACAGATCATC      |           |                       |                                       |                        |
| 3  | STM1058for  | ACAATTTAATTCAAgAAgCTAagg    | (3)       | Z13992                | (ATT) <sub>n</sub>                    | 113                    |
|    | STM1058rev  | CCAAATTTgTATACTTCAATATgA    |           |                       |                                       |                        |
| 4  | STG0008for  | TCCTCgAAAAATTCCTCCAC        | (2)       | BE341755              | (GT) <sub>n</sub>                     | -                      |
|    | STG0008rev  | CgCCTTCTTCAACAATCCAT        |           |                       |                                       |                        |
| 4  | STG0020for  | gTCATCCgAAgATggAggAA        | (2)       | BI405354              | (GAT) <sub>n</sub>                    | -                      |
|    | STG0020rev  | CTggACTgTCTTCACCACCA        |           |                       |                                       |                        |
| 4  | STI0001for  | CAGCAAAATCAGAACCCgAT        | (1)       | CK860917              | (AAT) <sub>n</sub>                    | 188                    |
|    | STI0001rev  | ggATCATCAAATTCACCgCT        |           |                       |                                       |                        |
| 4  | STI0012for  | gAAgCgACTTCCAAAATCAGa       | (1)       | U69633                | (ATT) <sub>n</sub>                    | 183                    |
|    | STI0012rev  | AAAgggAggAATAgAAACCAAAA     |           |                       |                                       |                        |
| 5  | STG0021for  | gCCTACTgCCCAAAACATT         | (2)       | BQ506520              | (AAGA) <sub>n</sub>                   | 136                    |
|    | STG0021rev  | ACTggCTgggAAgCATAAC         |           |                       |                                       |                        |
| 5  | STI0032for  | gggAAgAATCCTgAAATgg         | (1)       | BQ120452              | (GGA) <sub>n</sub>                    | 120                    |
|    | STI0032rev  | TgCTCTACCAATTAACggCA        |           |                       |                                       |                        |



|    |            |                           |     |           |                                                                                         |           |
|----|------------|---------------------------|-----|-----------|-----------------------------------------------------------------------------------------|-----------|
| 5  | STM1031for | GTGTTTGTCTCTGTAT          | (3) | X55748    | (AT) <sub>n</sub>                                                                       | 275       |
|    | STM1031rev | AATTCATTCCTCATCTCTA       |     |           |                                                                                         |           |
| 5  | STM5149for | CCCAAACCTAACCTAATTAC      | (6) | [p120M22] | (AAG) <sub>n</sub>                                                                      | -         |
|    | STM5149rev | GCGACTCTATTAATCACTTGAC    |     |           |                                                                                         |           |
| 6  | STI0004for | GCTgCTAAACACTCAAgCAGAA    | (1) | BQ118939  | (AAG) <sub>n</sub>                                                                      | 103       |
|    | STI0004rev | CAACTACAAgATTCCATCCACAg   |     |           |                                                                                         |           |
| 6  | STI0021for | CATCAAgTCgTCgTCATCAA      | (1) | TC94434   | (CAT) <sub>n</sub>                                                                      | 106       |
|    | STI0021rev | TCgAATgATCCAAAgCTTCC      |     |           |                                                                                         |           |
| 6  | STM1019for | AgATTTTATTATCCCAACAAGCA   | (3) | L01402    | (ATC) <sub>n</sub>                                                                      | -         |
|    | STM1019rev | CAACTACCTTCTCCCCACATAg    |     |           |                                                                                         |           |
| 6  | STM5126for | gCAACAgCgCATCAACAAA       | (6) | [p46L10]  | (AAG) <sub>n</sub>                                                                      | -         |
|    | STM5126rev | TCCAAATCCATCCCATTgAg      |     |           |                                                                                         |           |
| 7  | STI0025for | CTgCCgCAAAAAGTgAAAAC      | (1) | BQ119932  | (CTCC) <sub>n</sub>                                                                     | 116       |
|    | STI0025rev | TgAATgTAggCCAAATTTTgAA    |     |           |                                                                                         |           |
| 7  | STI0033for | gAgggTTTTCAgAAAgggA       | (1) | BG886969  | (AGG) <sub>n</sub>                                                                      | 133       |
|    | STI0033rev | CATCCTTgCAACAACCTCCT      |     |           |                                                                                         |           |
| 7  | STM0031for | CATACgCACgCACgTACAC       | (3) | [PAC50]   | (AC) <sub>n</sub> ...(AC) <sub>n</sub><br>GCAC (AC) <sub>n</sub><br>(GCAC) <sub>n</sub> | 168 - 211 |
|    | STM0031rev | TCAACCTATCATTTTgTgAgTCg   |     |           |                                                                                         |           |
| 7  | STM1004for | ATATgAAATTCTCTCgATgTTTCg  | (3) | Z27235    | (AAG) <sub>n</sub>                                                                      | 163       |
|    | STM1004rev | TCAgCCCATAAAXCTTTAgTTACCT |     |           |                                                                                         |           |
| 7  | STM5144for | CAATgAgAATTgTggAggCAAg    | (6) | [p104M6]  | (TAA) <sub>n</sub> ...(TA) <sub>n</sub>                                                 | -         |
|    | STM5144rev | gCATATAAATTCAAAGATCACg    |     |           |                                                                                         |           |
| 8  | STGBSS2for | AATCggTgATAAATgTgAATgC    | (4) | EU548082  | (TCT) <sub>n</sub>                                                                      | 121-150   |
|    | STGBSS2rev | ATgCTTgCCATgTgATgTgT      |     |           |                                                                                         |           |
| 8  | STI0003for | ACCATCCACCATgTCAATgC      | (1) | AW096896  | (ACC) <sub>n</sub>                                                                      | 144       |
|    | STI0003rev | CTCATggATggTgTCATTgg      |     |           |                                                                                         |           |
| 8  | STM0024for | CATTACCTTgTgAgATTAgATTg   | (3) | [PAC42]   | (GTT) <sub>n</sub> ...(AC) <sub>n</sub><br>(AT) <sub>n</sub>                            | -         |
|    | STM0024rev | CATATAAgTAggAATAggAggTTT  |     |           |                                                                                         |           |
| 8  | STM1104for | TgATTCTCTTgCCTACTgTAATCg  | (3) | EU548082  | (TCT) <sub>n</sub>                                                                      | 165       |
|    | STM1104rev | CAAAGTggTgTgAAgCTgTgA     |     |           |                                                                                         |           |
| 8  | Stpatpgfor | CAACCAACAAggTAAATggTACC   | (5) | X04077    | (AATT) <sub>n</sub>                                                                     | 386       |
|    | Stpatpgrev | TggTCTggTgCATTAgAAAAAA    |     |           |                                                                                         |           |
| 9  | STG0011for | TTgCTCCTCCTCCACTTgAT      | (2) | BQ046381  | (AAC) <sub>n</sub>                                                                      | 147       |
|    | STG0011rev | CACACACCTCAAATTggTCg      |     |           |                                                                                         |           |
| 9  | STI0014for | AgAAACTgAgTTgTgTTTgggA    | (1) | BQ115461  | (TGG) <sub>n</sub> (AGG) <sub>n</sub>                                                   | 129       |
|    | STI0014rev | TCAACAgTCTCAgAAAACCCTCT   |     |           |                                                                                         |           |
| 9  | STM1051for | CCCCTTggCATTTTCTTCTCC     | (3) | AJ133765  | (TAT) <sub>n</sub><br>TTT(TAT) <sub>n</sub>                                             | 226       |
|    | STM1051rev | TTTAgggTggggTgAggTTgg     |     |           |                                                                                         |           |
| 9  | STM3012for | CAACTCAAACCAGAAGGCAAAA    | (3) | -         | (CT) <sub>4</sub> ...(CT) <sub>8</sub>                                                  | 193       |
|    | STM3012rev | GAGAAATGGGCACAAAAACA      |     |           |                                                                                         |           |
| 10 | STG0025for | ggAATCCgAATTACgCTC        | (2) | BQ506618  | (AAAC) <sub>n</sub>                                                                     | -         |
|    | STG0025rev | AggTTTTACCACTCgggCTT      |     |           |                                                                                         |           |
| 10 | STM1040for | AgTACTCAgTCAATCAAAG       | (3) | Z11882    | (A) <sub>n</sub>                                                                        | 173       |
|    | STM1040rev | AggTAAgTATgTTCTCCAg       |     |           |                                                                                         |           |
| 10 | STM5117for | CCACATTAGAAAACCCCTC       | (6) | [p29E24]  | (GAA) <sub>n</sub>                                                                      | -         |

|    |            |                            |     |              |                                          |         |
|----|------------|----------------------------|-----|--------------|------------------------------------------|---------|
|    | STM5117rev | AGGACGCTGGTACATGTTAGA      |     |              |                                          |         |
| 10 | STM5132for | AgTTCACgAgAggTATCCATg      | (6) | [p20H20]     | (TAA) <sub>n</sub>                       | -       |
|    | STM5132rev | gAAATTCAgATCCACCgCAA       |     |              |                                          |         |
| 11 | STG0001for | CAGCCAACATTTgTACCCCT       | (2) | BE340539     | (CT) <sub>n</sub>                        | 126     |
|    | STG0001rev | ACCCCCACTTgCCATATTTT       |     |              |                                          |         |
| 11 | STG0004for | gAAAgCCAATCTCACTggA        | (2) | BI434815     | (GT) <sub>n</sub>                        | 212-217 |
|    | STG0004rev | TATAATTggCTTgCgAgTgC       |     |              |                                          |         |
| 11 | STI0018for | CCACTACTgCTTCCTCCACC       | (1) | (TC98351)    | (GTT) <sub>n</sub>                       | 189     |
|    | STI0018rev | gCAGCAACAACAAGCTCAAC       |     |              |                                          |         |
| 11 | STI0028for | ATACCCTCCAATgggTCCTT       | (1) | (TC97044)    | (CAA) <sub>imp</sub>                     | 170-217 |
|    | STI0028rev | CTTggAgATtgCAAgAAgAA       |     |              |                                          |         |
| 11 | STM5130for | AAAgTACAgCgAAgATgACgAC     | (6) | [p2115]      | (CGG) <sub>n</sub>                       | -       |
|    | STM5130rev | TTACCTTTgCAACCTTgCC        |     |              |                                          |         |
| 12 | STI0030for | gACCCTCCAACTATAgATTCTTC    | (1) | BF188393     | (ATT) <sub>n</sub>                       | 105     |
|    | STI0030rev | TgACAACCTTTAAAgCATATgTCAGC |     |              |                                          |         |
| 12 | STI0051for | ggTCTCCATTAgCCCTCTgAg      | (1) | (TC96682)    | (TA) <sub>n</sub>                        | -       |
|    | STI0051rev | ACATAAATggATCACACA         |     |              |                                          |         |
| 12 | STI0063for | gCATTCTATggCCAACATTgg      | (1) | (T_AW030425) | (GAT) <sub>imp</sub>                     | 252     |
|    | STI0063rev | AgATTCTCCTCAATTTCCCAgC     |     |              |                                          |         |
| 12 | STM0030for | AGAGATCGATGTAAAACACGT      | (3) | [PAC05]      | compound<br>(GT/GC)<br>(GT) <sub>n</sub> | -       |
|    | STM0030rev | GTGGCATTTTGATGGATT         |     |              |                                          |         |
| 12 | STM5121for | CACCggAATAAgCggATCT        | (6) | [p46L17]     | (TGT) <sub>n</sub>                       | 297-309 |
|    | STM5121rev | TCTTCCCTTCCATTTgTCA        |     |              |                                          |         |

**Table S6. Selected 23 transcripts identified in Sprenger et al. [39]**

| <b>Transcript name</b>                              | <b>PGSC-ID (DMT)</b> | <b>PGSC-ID (DMG)</b> | <b>Marker name</b> |
|-----------------------------------------------------|----------------------|----------------------|--------------------|
| Glutathione S-transferase                           | PGSC0003DMT400004539 | PGSC0003DMG400001804 | HRO_GlutST         |
| Bacterial spot disease resistance protein 4         | PGSC0003DMT400006231 | PGSC0003DMG400002427 | HRO_BSDRP4         |
| Beta-D-glucan exohydrolase                          | PGSC0003DMT400015224 | PGSC0003DMG402005942 | HRO_BDGEH          |
| SBT4B protein                                       | PGSC0003DMT400017633 | PGSC0003DMG400006840 | HRO_SBT4B          |
| Ethylene-inducing xylanase                          | PGSC0003DMT400020366 | PGSC0003DMG400007876 | HRO_EIX            |
| Glucosyltransferase                                 | PGSC0003DMT400021019 | PGSC0003DMG400008138 | HRO_GLUCT          |
| Serine-threonine protein kinase, plant-type         | PGSC0003DMT400028434 | PGSC0003DMG400010951 | HRO_STPKPT         |
| Multidrug resistance protein ABC transporter family | PGSC0003DMT400031714 | PGSC0003DMG400012167 | HRO_MRPAF          |
| BED finger-nbs-lrr resistance protein               | PGSC0003DMT400035714 | PGSC0003DMG400013736 | HRO_BFNBLRP        |
| S-locus-specific glycoprotein S6                    | PGSC0003DMT400036026 | PGSC0003DMG401013876 | HRO_SLSGPS6        |
| Kinase                                              | PGSC0003DMT400042362 | PGSC0003DMG400016429 | HRO_KIN            |
| Receptor protein kinase                             | PGSC0003DMT400045689 | PGSC0003DMG400017718 | HRO_RPK            |
| UDP-glucose:glucosyltransferase                     | PGSC0003DMT400049125 | PGSC0003DMG400019093 | HRO_UDPGGT         |
| Methionyl-tRNA synthetase                           | PGSC0003DMT400049172 | PGSC0003DMG400019113 | HRO_MTRNAS         |
| Flagellin-sensing 2                                 | PGSC0003DMT400068776 | PGSC0003DMG401026747 | HRO_FSL2           |
| TIR-NBS-LRR disease resistance                      | PGSC0003DMT400071445 | PGSC0003DMG400027797 | HRO_TNLDR          |
| LRR receptor-like serine/threonine-protein kinase   | PGSC0003DMT400071885 | PGSC0003DMG400027968 | HRO_LRRSTPK        |
| Poly (ADP-ribose) glycohydrolase                    | PGSC0003DMT400075512 | PGSC0003DMG400029361 | HRO_PARGH          |
| Bacterial spot disease resistance protein 4         | PGSC0003DMT400080813 | PGSC0003DMG400031476 | HRO_BSDRP4         |
| Extensin                                            | PGSC0003DMT400082012 | PGSC0003DMG401032203 | HRO_EXT            |
| Lipoxygenase                                        | PGSC0003DMT400082023 | PGSC0003DMG400032207 | HRO_LIPOX          |
| Betaine aldehyde dehydrogenase                      | PGSC0003DMT400083025 | PGSC0003DMG400033028 | HRO_BADH           |
| Vacuolar protein sorting protein                    | PGSC0003DTM400008981 | PGSC0003DMG400003501 | HRO_VPSP           |

**Table S7. Characterization of 75 polymorphic SSR primer combinations**

| Marker Name   | Reference - Gene ID <sup>1</sup><br>PGSC0003 | Chromosome location | Repeat Motif                                                                     | Expected product size <sup>2</sup><br>in bp | Observed product size<br>in bp | Allele sizes<br>in bp                                                                    | Total number<br>of alleles | PIC<br>value | H <sub>e</sub><br>value | Scoring<br>efficiency <sup>3</sup> |
|---------------|----------------------------------------------|---------------------|----------------------------------------------------------------------------------|---------------------------------------------|--------------------------------|------------------------------------------------------------------------------------------|----------------------------|--------------|-------------------------|------------------------------------|
| HRO_ABA8H4_2  | DMG400007972                                 | IV                  | (GT) <sub>2</sub> (AT) <sub>7</sub>                                              | 200                                         | 219-224                        | 219, 223, 224                                                                            | 3                          | 0.4117       | 0.4998                  | 1                                  |
| HRO_ACO_1     | DMG400021476                                 | II                  | (AT) <sub>8</sub>                                                                | 134                                         | 140-156                        | 140, 144, 149, 156                                                                       | 4                          | 0.6132       | 0.6762                  | 1                                  |
| HRO_ACO_4     | DMG400009719                                 | IX                  | (GA) <sub>12</sub>                                                               | 172                                         | 175-191                        | 175, 177, 180, 181, 184, 191                                                             | 6                          | 0.6692       | 0.7203                  | 1                                  |
| HRO_ACS_2     | DMG400000284                                 | XII                 | (AT) <sub>6</sub>                                                                | 139                                         | 157-178                        | 157, 161, 178                                                                            | 3                          | 0.3          | 0.3254                  | 1                                  |
| HRO_ACS2_1    | DMG400000193                                 | I                   | (TTA) <sub>5</sub> T (TAA) <sub>9</sub>                                          | 211                                         | 202-238                        | 202, 206, 213, 221, 226, 238                                                             | 6                          | 0.6939       | 0.7387                  | 1                                  |
| HRO_ACS3      | DMG400021426                                 | II                  | (AT) <sub>9</sub>                                                                | 159                                         | 170-181                        | 170, 173, 174, 177, 181                                                                  | 5                          | 0.6546       | 0.7064                  | 1                                  |
| HRO_ACS4_1    | DMG400021651                                 | V                   | (ACT) <sub>5</sub>                                                               | 104                                         | 118-120                        | 118, 120                                                                                 | 2                          | 0.2896       | 0.3512                  | 1                                  |
| HRO_ALDH      | DMG400034597                                 | IX                  | (AT) <sub>12</sub> (AG) <sub>12</sub> ATA (GA) <sub>9</sub>                      | 177                                         | 156-199                        | 156, 159, 162, 163, 166, 169, 175, 176, 179, 181, 184, 186, 188, 190, 192, 196, 197, 199 | 18                         | 0.9003       | 0.9075                  | 2                                  |
| HRO_APX_2     | DMG401001731                                 | IX                  | (TA) <sub>3</sub> C (TA) <sub>3</sub>                                            | 174                                         | 196-202                        | 196, 198, 202                                                                            | 3                          | 0.3741       | 0.4159                  | 3                                  |
| HRO_ARF6_1    | DMG400028826                                 | XII                 | (CT) <sub>2</sub> (TAAAT) <sub>2</sub> (GAA) <sub>2</sub>                        | 219                                         | 238-243                        | 238, 243                                                                                 | 2                          | 0.1706       | 0.1884                  | 1                                  |
| HRO_BA_1      | DMG400000169                                 | I                   | (GAG) <sub>2</sub> AAA (GAA) <sub>3</sub> (GA) <sub>3</sub> A (GAA) <sub>2</sub> | 213                                         | 207-268                        | 207, 213, 251, 255, 264, 266, 268                                                        | 7                          | 0.72         | 0.7603                  | 1                                  |
| HRO_BADH_2    | DMG400033028                                 | VI                  | (GT) <sub>3</sub> CA (GT) <sub>4</sub>                                           | 195                                         | 209-219                        | 209, 212, 214, 219                                                                       | 4                          | 0.5975       | 0.6682                  | 1                                  |
| HRO_BDGEH_1B  | DMG402005942                                 | VI                  | (GT) <sub>2</sub> (TA) <sub>2</sub> CATGG (AT) <sub>4</sub>                      | 138                                         | 159-161                        | 159, 161                                                                                 | 2                          | 0.2392       | 0.2778                  | 1                                  |
| HRO_BFNLRP_2C | DMG400013736                                 | XII                 | (TA) <sub>2</sub> GACTA (TC) <sub>2</sub> ATTC (TTTA) <sub>2</sub>               | 175                                         | 196-197                        | 196, 197                                                                                 | 2                          | 0.1046       | 0.1107                  | 2                                  |
| HRO_BSDRP4_5A | DMG400002427                                 | VI                  | (TCT) <sub>4</sub> GTG (AGT) <sub>2</sub>                                        | 132                                         | 155-172                        | 155, 164, 166, 169, 172                                                                  | 5                          | 0.7664       | 0.7986                  | 2                                  |
| HRO_BSDRP4_5C | DMG400002427                                 | VI                  | (TTTA) <sub>5</sub> T (TA) <sub>2</sub>                                          | 158                                         | 157-180                        | 157, 162, 172, 175, 177, 179, 180                                                        | 7                          | 0.7866       | 0.8136                  | 1                                  |
| HRO_BSDRP4_9C | DMG400031476                                 | XI                  | (CT) <sub>2</sub> (TA) <sub>3</sub> T (TAA) <sub>2</sub>                         | 152                                         | 175-194                        | 175, 194                                                                                 | 2                          | 0.3726       | 0.4953                  | 2                                  |
| HRO_CTR1K     | DMG400008384                                 | X                   | (TA) <sub>2</sub> (TAT) <sub>5</sub>                                             | 197                                         | 220-223                        | 220, 221, 223                                                                            | 3                          | 0.5157       | 0.5848                  | 2                                  |
| HRO_D1P5CS_1  | DMG402026767                                 | VI                  | (TTA) <sub>10</sub>                                                              | 187                                         | 202-216                        | 202, 205, 207, 208, 216                                                                  | 5                          | 0.6065       | 0.6534                  | 1                                  |
| HRO_D1P5CS_2  | DMG402026767                                 | VI                  | (CT) <sub>5</sub> T (TA) <sub>2</sub>                                            | 168                                         | 189-200                        | 189, 200                                                                                 | 2                          | 0.2225       | 0.255                   | 1                                  |
| HRO_EBF1_1a   | DMG400030928                                 | VII                 | (CT) <sub>3</sub> T (CAA) <sub>3</sub>                                           | 177                                         | 219-227                        | 219, 223, 227                                                                            | 3                          | 0.4798       | 0.5568                  | 1                                  |

|                |              |     |                                                                                          |     |         |                                        |   |        |        |   |
|----------------|--------------|-----|------------------------------------------------------------------------------------------|-----|---------|----------------------------------------|---|--------|--------|---|
| HRO_EBF1_2     | DMG40002914  | XII | (AT) <sub>2</sub> (TGTC) <sub>2</sub> GA (TGT) <sub>2</sub>                              | 181 | 202-272 | 202, 267, 272                          | 3 | 0.5274 | 0.6099 | 1 |
| HRO_EIL2_1     | DMG400008712 | I   | (ACCCTC) <sub>2</sub> (CT) <sub>5</sub>                                                  | 132 | 153-180 | 153, 161, 166, 172, 180                | 5 | 0.6076 | 0.6518 | 1 |
| HRO_EIN2_1A    | DMG400021547 | IX  | (TC) <sub>7</sub> (AT) <sub>2</sub> (GT) <sub>9</sub>                                    | 183 | 204-226 | 204, 206, 210, 211, 215, 219, 224, 226 | 8 | 0.7979 | 0.8214 | 2 |
| HRO_EIX_1E     | DMG400007876 | XII | (GT) <sub>5</sub> GGGG (CA) <sub>2</sub>                                                 | 149 | 168-192 | 168, 169, 171, 192                     | 4 | 0.4486 | 0.5488 | 2 |
| HRO_EREBP_1A   | DMG400001067 | XII | (CTT) <sub>2</sub> (TC) <sub>6</sub> CCC (CTG) <sub>2</sub>                              | 178 | 196-208 | 196, 199, 208                          | 3 | 0.4136 | 0.5146 | 2 |
| HRO_EREBP1_1   | DMG400029713 | II  | (GTGTT) <sub>4</sub> (GTTT) <sub>2</sub> (GT) <sub>2</sub> (TG) <sub>3</sub>             | 200 | 193-230 | 193, 205, 206, 212, 219, 220, 224, 230 | 8 | 0.6028 | 0.6531 | 2 |
| HRO_EREBPC2_1  | DMG400016003 | V   | (GTTG) <sub>2</sub> AA (TAT) <sub>2</sub> GAAA (GAATT) <sub>2</sub>                      | 202 | 224-246 | 224, 225, 226, 239, 246                | 5 | 0.6758 | 0.7267 | 2 |
| HRO_ERF114_1   | DMG400014240 | III | (CTT) <sub>3</sub> CAT (CTT) <sub>2</sub>                                                | 211 | 219-231 | 219, 231                               | 2 | 0.3297 | 0.4163 | 1 |
| HRO_ERF141     | DMG400028853 | XII | (GA) <sub>4</sub> (TTTTTA) <sub>2</sub>                                                  | 199 | 214-302 | 214, 217, 283, 297, 302                | 5 | 0.6891 | 0.736  | 1 |
| HRO_ERF4_1     | DMG400016004 | V   | (TAA) <sub>2</sub> (GAA) <sub>3</sub> TTAC (AG) <sub>2</sub>                             | 197 | 218-219 | 218, 219                               | 2 | 0.1379 | 0.149  | 2 |
| HRO_ERS1_1     | DMG400031819 | IX  | (GCA) <sub>5</sub> (GC) <sub>2</sub>                                                     | 190 | 182-210 | 182, 183, 191, 196, 205, 207, 210      | 7 | 0.7399 | 0.776  | 1 |
| HRO_ETOP1_3    | DMG400015898 | X   | (AT) <sub>2</sub> CATAAT (CCT) <sub>3</sub>                                              | 189 | 210-213 | 210, 211, 213                          | 3 | 0.5866 | 0.6609 | 1 |
| HRO_ETR1_1A    | DMG400007843 | XII | (ATA) <sub>2</sub> AAA (ATA) <sub>4</sub>                                                | 180 | 186-196 | 186, 189, 193, 196                     | 4 | 0.6108 | 0.6669 | 1 |
| HRO_ETRHOM_2A  | DMG400028694 | XI  | (GT) <sub>4</sub> A (TG) <sub>6</sub>                                                    | 127 | 142-154 | 142, 152, 154                          | 3 | 0.4667 | 0.5552 | 1 |
| HRO_ETRTF_5a   | DMG400002185 | XI  | (CCA) <sub>4</sub> (ACA) <sub>3</sub>                                                    | 198 | 217-221 | 217, 218, 220, 221                     | 4 | 0.6711 | 0.7218 | 1 |
| HRO_ETRTF13_1A | DMG400026046 | I   | (CTT) <sub>3</sub> (CTC) <sub>5</sub>                                                    | 185 | 207-209 | 207, 209                               | 2 | 0.1379 | 0.149  | 2 |
| HRO_ETRTF3_2   | DMG400014417 | X   | (CGG) <sub>7</sub>                                                                       | 169 | 177-191 | 177, 183, 186, 191                     | 4 | 0.6317 | 0.6882 | 1 |
| HRO_EXT_1D     | DMG401032203 | I   | (ACC) <sub>2</sub> TC (CAC) <sub>3</sub> GAT (CAC) <sub>3</sub> CT<br>(CCA) <sub>3</sub> | 199 | 190-224 | 190, 195, 209, 211, 224                | 5 | 0.6084 | 0.6761 | 2 |
| HRO_FLS2_1A    | DMG401026747 | III | (AT) <sub>3</sub> (TAT) <sub>2</sub> (GA) <sub>2</sub>                                   | 142 | 155-164 | 155, 159, 164                          | 3 | 0.4114 | 0.4859 | 1 |
| HRO_G3O_1      | DMG400016516 | VI  | (ACC) <sub>5</sub> (AAT) <sub>3</sub>                                                    | 152 | 170-177 | 170, 173, 177                          | 3 | 0.4737 | 0.5493 | 1 |
| HRO_GLUCT_7C   | DMG400008138 | X   | (TC) <sub>7</sub> TGTT (TC) <sub>3</sub>                                                 | 214 | 232-252 | 232, 239, 247, 249, 252                | 5 | 0.5966 | 0.662  | 1 |
| HRO_GLUTST_1A  | DMG400001804 | I   | (AT) <sub>4</sub> G (TA) <sub>2</sub>                                                    | 153 | 177     | 177                                    | 1 | 0.00   | 0.00   | 1 |
| HRO_GLUTST_1C  | DMG400001804 | I   | (GT) <sub>4</sub> AT (TAG) <sub>2</sub>                                                  | 131 | 154     | 154                                    | 1 | 0.00   | 0.00   | 1 |
| HRO_JA2_1      | DMG400015342 | XII | (TA) <sub>2</sub> GT (TG) <sub>2</sub> (TAA) <sub>3</sub> AA (TGA) <sub>2</sub>          | 223 | 210-228 | 210, 228                               | 2 | 0.3318 | 0.42   | 2 |

|                |              |        |                                                                                      |     |         |                                   |   |        |        |   |
|----------------|--------------|--------|--------------------------------------------------------------------------------------|-----|---------|-----------------------------------|---|--------|--------|---|
| HRO_KIN_1      | DMG400016429 | I      | (TC) <sub>2</sub> AAGC (AT) <sub>4</sub>                                             | 132 | 151-158 | 151, 154, 158                     | 3 | 0.5917 | 0.6657 | 2 |
| HRO_LEA5_1     | DMG400017936 | VI     | (TA) <sub>3</sub> A (TA) <sub>2</sub> A (TA) <sub>2</sub>                            | 142 | 156-167 | 156, 158, 161, 162, 166, 167      | 6 | 0.7134 | 0.7491 | 2 |
| HRO_LIPOX_1B   | DMG400032207 | I      | (TC) <sub>3</sub> TA (CT) <sub>2</sub>                                               | 135 | 158-159 | 158, 159                          | 2 | 0.3576 | 0.4664 | 2 |
| HRO_LRRSTPK_1C | DMG400027968 | IV     | (AT) <sub>3</sub> (CATAT) <sub>2</sub> A (ATATC) <sub>2</sub> (AT) <sub>3</sub>      | 203 | 209-249 | 209, 219, 221, 224, 228, 239, 249 | 7 | 0.6569 | 0.7112 | 2 |
| HRO_MOCOS_1A   | DMG400022125 | VII    | (TCT) <sub>3</sub> G (CA) <sub>2</sub> ATTT (AT) <sub>2</sub> TGGT (TG) <sub>2</sub> | 184 | 194-208 | 194, 204, 208                     | 3 | 0.3491 | 0.4002 | 1 |
| HRO_MRPATF_3D  | DMG400012167 | VIII   | (ATA) <sub>2</sub> TA (AT) <sub>6</sub> (GAT) <sub>2</sub>                           | 163 | 185     | 185                               | 1 | 0.00   | 0.00   | 1 |
| HRO_MTRNAS_1D  | DMG400019113 | V      | (AT) <sub>3</sub> AC (AT) <sub>3</sub> (GT) <sub>3</sub>                             | 131 | 151-161 | 151, 154, 159, 161                | 4 | 0.5611 | 0.6299 | 1 |
| HRO_NCED_2     | DMG400027633 | VII    | (GA) <sub>3</sub> G (TA) <sub>4</sub>                                                | 145 | 168-170 | 168, 170                          | 2 | 0.3675 | 0.4851 | 2 |
| HRO_NCED_3     | DMG400004311 | VIII   | (TA) <sub>3</sub> (TGTTT) <sub>2</sub> (CTT) <sub>3</sub>                            | 134 | 151-162 | 151, 158, 159, 162                | 4 | 0.2217 | 0.2327 | 1 |
| HRO_NDPK2_1    | DMG400026976 | VI     | (AT) <sub>4</sub> (TTA) <sub>2</sub>                                                 | 182 | 202-204 | 202, 204                          | 2 | 0.3606 | 0.4721 | 1 |
| HRO_P5CR_2     | DMG400010441 | II     | (TA) <sub>3</sub> (TAAAA) <sub>2</sub>                                               | 184 | 202-204 | 202, 204                          | 2 | 0.3749 | 0.4998 | 1 |
| HRO_PARGH_1A   | DMG400029361 | XII    | (GA) <sub>4</sub> AA (GA) <sub>2</sub>                                               | 135 | 147-156 | 147, 156                          | 2 | 0.3201 | 0.4002 | 1 |
| HRO_PARGH_1C   | DMG400029361 | XII    | (TA) <sub>2</sub> G (TA) <sub>8</sub>                                                | 175 | 192-195 | 192, 193, 195                     | 3 | 0.4023 | 0.4444 | 1 |
| HRO_POD1_2     | DMG400010050 | II     | (TG) <sub>3</sub> (AT) <sub>4</sub>                                                  | 117 | 130-145 | 130, 139, 141, 143, 145           | 5 | 0.6375 | 0.6932 | 1 |
| HRO_PP2C       | DMG400011321 | I      | (GAA) <sub>3</sub> A (AT) <sub>2</sub> CAT (GAT) <sub>2</sub>                        | 182 | 196-205 | 196, 205                          | 2 | 0.3346 | 0.4248 | 1 |
| HRO_PP2C1_2    | DMG400032110 | I      | (GGT) <sub>2</sub> (GT) <sub>2</sub> (CT) <sub>3</sub>                               | 149 | 168-173 | 168, 171, 173                     | 3 | 0.4126 | 0.5103 | 1 |
| HRO_RPK_10D    | DMG400017718 | IV     | (TC) <sub>2</sub> CCA (AT) <sub>3</sub> TTC (CA) <sub>2</sub>                        | 158 | 180-191 | 180, 182, 190, 192                | 4 | 0.4671 | 0.5637 | 2 |
| HRO_SBT4B_1B   | DMG400006840 | I      | (AG) <sub>2</sub> G (TAT) <sub>2</sub> T (GTA) <sub>3</sub>                          | 101 | 103-124 | 103, 124                          | 2 | 0.1986 | 0.2235 | 1 |
| HRO_SIPP_1     | DMG400012223 | VIII   | (ATC) <sub>2</sub> AC (AT) <sub>5</sub>                                              | 206 | 224-234 | 224, 228, 230, 232, 234           | 5 | 0.6094 | 0.677  | 1 |
| HRO_SLSGPS6_5C | DMG401013876 | II     | (ATA) <sub>2</sub> (AAT) <sub>4</sub> ACCT (TA) <sub>2</sub>                         | 183 | 205-227 | 206, 215, 227                     | 3 | 0.3213 | 0.372  | 1 |
| HRO_STPK       | DMG400000652 | XII    | (CT) <sub>3</sub> TTT (CT) <sub>2</sub> TT (CT) <sub>3</sub>                         | 178 | 161-183 | 161, 171, 174, 180, 183           | 5 | 0.6796 | 0.7259 | 1 |
| HRO_STPKPT_1A  | DMG400010951 | 0/ III | (TG) <sub>2</sub> (TA) <sub>2</sub> AATCA (CT) <sub>2</sub>                          | 115 | 129-142 | 129, 138, 142                     | 3 | 0.4318 | 0.4906 | 1 |
| HRO_STPKPT_1B  | DMG400010951 | 0/ III | (AGT) <sub>2</sub> (TG) <sub>3</sub>                                                 | 166 | 188-193 | 188, 193                          | 2 | 0.1706 | 0.1884 | 2 |
| HRO_TNLDR_2A   | DMG400027797 | XI     | (AT) <sub>4</sub> AAA (TGA) <sub>2</sub>                                             | 164 | 170-186 | 170, 186                          | 3 | 0.3936 | 0.5048 | 1 |

|               |                           |      |                                                                |     |         |                    |   |        |        |   |
|---------------|---------------------------|------|----------------------------------------------------------------|-----|---------|--------------------|---|--------|--------|---|
| HRO_TPS1_1    | DMG400007089              | VII  | (TA) <sub>3</sub> (CA) <sub>3</sub>                            | 156 | 178-180 | 178, 180           | 2 | 0.369  | 0.4882 | 2 |
| HRO_UDPGGT_1A | DMG400019093              | 0    | (TG) <sub>2</sub> ATT (GA) <sub>2</sub> T (TGGG) <sub>2</sub>  | 141 | 151-164 | 151, 164           | 2 | 0.2896 | 0.3512 | 1 |
| HRO_UGP_1     | DMG401013333              | XI   | (TA) <sub>2</sub> (GT) <sub>8</sub>                            | 177 | 196-199 | 196, 199           | 2 | 0.3508 | 0.4537 | 1 |
| HRO_VPSP_1B   | DMG400003501<br>(SPUD DB) | 0    | (TGG) <sub>2</sub> ACT (AT) <sub>2</sub> G (GA) <sub>4</sub>   | 157 | 182-183 | 182, 183           | 2 | 0.3538 | 0.4592 | 2 |
| HRO_WRKYTF_1B | DMG400008188              | VIII | (TAC) <sub>2</sub> GCC (ATGT) <sub>4</sub> (TA) <sub>2</sub>   | 204 | 230-231 | 230, 231           | 2 | 0.355  | 0.4614 | 2 |
| HRO_ZE_1      | DMG400004020              | II   | (CT) <sub>2</sub> ATG (TA) <sub>3</sub> CAA (TTA) <sub>2</sub> | 200 | 216-222 | 216, 218, 219, 222 | 4 | 0.4949 | 0.5686 | 2 |

<sup>1</sup>Phytozome

<sup>2</sup>without M13 forward tail (labelled with fluorescent IRD700 or IRD800 M13 primer)

<sup>3</sup>1 = Easy to score, 2 = Average to score, 3 = Bad or no scoring















|                 |                                                                                       |        |
|-----------------|---------------------------------------------------------------------------------------|--------|
| HRO_STPK_C      | 1 0 0 0 0 0 1 0 0 1 0 0 0 0 1 1 0 0 0 0 1 0 0 0 1 1 0 1 0 0 1 1 0 1 0 0 1 1 1 1       | 0.4813 |
| HRO_STPK_D      | 0 0 0 0 1 0 0 0 1 0 0 0 1 0 0 0 0 0 1 1 0 0 0 0 0 0 0 0 0 0 0 0 0 0 0 0 0 0 0 0       | 1.0000 |
| HRO_STPK_E      | 0 0 0 0 0 1 0 0 0 0 1 1 0 0 0 0 1 0 0 0 1 1 0 0 0 0 0 0 0 0 0 0 0 0 0 0 0 0 0 0 0 0   | 1.0000 |
| HRO_STPKPT_1A_A | 0 1 0 1 0 1 0 0 0 1 0 0 1 1 0 1 1 1 0 0 0 0 0 0 1 0 0 0 0 0 0 0 0 0 0 0 0 0 0 0 0 0   | 0.2818 |
| HRO_STPKPT_1A_B | 1 1 1 1 1 1 1 1 1 1 1 1 1 1 1 1 1 1 1 1 1 1 1 1 1 1 1 1 1 1 1 1 1 1 1 1 1 1 1 1 1 1   | 1.0000 |
| HRO_STPKPT_1A_C | 0 0 0 1 1 0 0 0 1 0 0 0 0 0 0 0 0 0 0 0 0 0 0 0 0 0 0 0 0 0 0 0 0 0 0 0 0 0 0 0 0 0   | 1.0000 |
| HRO_STPKPT_1B_A | 0 0 1 0 0 0 0 0 0 0 0 0 0 0 0 0 0 0 0 0 0 0 0 0 0 0 0 0 0 0 0 0 0 0 0 0 0 0 0 0 0 0   | 1.0000 |
| HRO_STPKPT_1B_B | 1 1 1 1 1 1 1 1 1 1 1 1 1 1 1 1 1 1 1 1 1 1 1 1 1 1 1 1 1 1 1 1 1 1 1 1 1 1 1 1 1 1   | 1.0000 |
| HRO_TNLDR_2A_A  | 1 1 1 1 1 1 1 1 1 1 1 1 1 1 1 1 0 1 1 1 1 1 1 1 1 1 1 1 1 1 1 1 1 1 1 1 1 1 1 1 1 1   | 1.0000 |
| HRO_TNLDR_2A_B  | 0 0 0 0 1 0 0 0 0 0 0 0 0 0 0 0 0 0 0 0 0 0 0 0 0 0 0 0 0 0 0 0 0 0 0 0 0 0 0 0 0 0   | 1.0000 |
| HRO_TNLDR_2A_C  | 1 0 1 0 0 0 1 0 1 1 1 1 1 1 1 1 1 1 1 1 1 1 0 0 1 1 1 0 1 0 1 0 1 1 0 1 1 1 1 1 1 1   | 1.2920 |
| HRO_TPS1_A      | 1 1 1 1 0 1 1 1 1 1 1 1 1 1 0 0 1 1 1 1 1 1 1 1 1 1 1 1 0 1 1 1 1 1 1 1 1 1 1 1 1 1   | 0.6012 |
| HRO_TPS1_B      | 1 1 1 1 1 0 1 0 1 1 1 1 1 1 1 1 0 0 0 1 1 0 0 1 0 1 0 0 1 1 0 0 1 1 0 1 1 1 1 1 1 0   | 0.7207 |
| HRO_UDPGGT_1A_A | 1 1 1 1 1 1 1 1 1 1 1 1 1 1 1 1 1 1 1 1 1 1 1 1 1 1 1 1 1 1 1 1 1 1 1 1 1 1 1 1 1 1   | 1.0000 |
| HRO_UDPGGT_1A_B | 0 0 1 0 1 0 0 0 0 0 0 0 0 1 0 1 0 0 0 0 0 0 0 1 1 0 1 1 1 0 0 0 0 0 0 0 0 0 0 0 0 0   | 0.7080 |
| HRO_UGP_A       | 0 0 0 0 1 0 0 0 1 0 0 0 1 0 0 0 1 0 0 0 0 0 0 0 0 0 0 0 0 0 0 0 0 0 0 0 0 0 0 0 0 0   | 1.0000 |
| HRO_UGP_B       | 0 0 1 1 0 0 0 1 0 0 0 0 0 0 0 0 1 1 0 1 0 1 0 1 1 1 0 1 0 1 0 1 1 1 1 0 0 0 0 0 0 0 0 | 0.4905 |
| HRO_VPSP_1B_A   | 1 1 1 1 1 1 1 1 1 1 0 1 1 0 1 0 1 0 1 1 1 1 1 1 0 1 1 1 1 1 1 1 1 1 0 0 1 1 1 1 1 1   | 1.0000 |
| HRO_VPSP_1B_B   | 0 0 1 0 1 1 1 0 1 0 1 0 0 1 0 0 0 1 0 1 1 1 0 1 0 1 1 0 0 0 0 0 0 0 0 0 0 0 0 0 0 0 0 | 1.0000 |
| HRO_WRKYTF_1B_A | 0 0 0 1 0 0 1 0 0 1 1 1 0 0 1 0 1 0 0 0 0 1 0 0 0 0 1 0 0 0 0 1 0 0 0 0 1 0 1 0 1 1 1 | 1.0000 |
| HRO_WRKYTF_1B_B | 1 1 1 1 1 1 1 0 1 1 0 1 0 1 0 1 1 0 1 1 0 1 1 0 1 0 1 0 1 0 1 0 1 0 1 0 1 0 1 0 1 0 1 | 0.4646 |
| HRO_ZE1_A       | 1 1 1 1 1 1 1 1 1 1 1 1 0 1 1 1 1 0 1 1 1 1 1 1 1 1 1 1 1 1 0 1 1 1 1 1 1 1 1 1 1 1   | 1.0000 |
| HRO_ZE1_B       | 0 0 0 0 0 0 0 0 0 0 0 0 0 0 0 0 0 0 0 0 0 0 0 0 0 0 0 0 0 0 0 0 0 0 0 0 0 0 0 0 0 0   | 0.4848 |
| HRO_ZE1_C       | 0 0 1 0 1 1 1 0 1 0 1 1 0 1 1 0 1 0 1 1 0 1 0 0 1 0 0 1 0 0 1 1 0 0 0 0 1 1 0 0 0 0 0 | 0.7319 |
| HRO_ZE1_D       | 0 0 0 0 0 0 0 0 0 0 0 0 0 0 0 0 0 0 0 0 0 0 0 0 0 0 0 0 0 0 0 0 0 0 0 0 0 0 0 0 0 0   | 0.6012 |

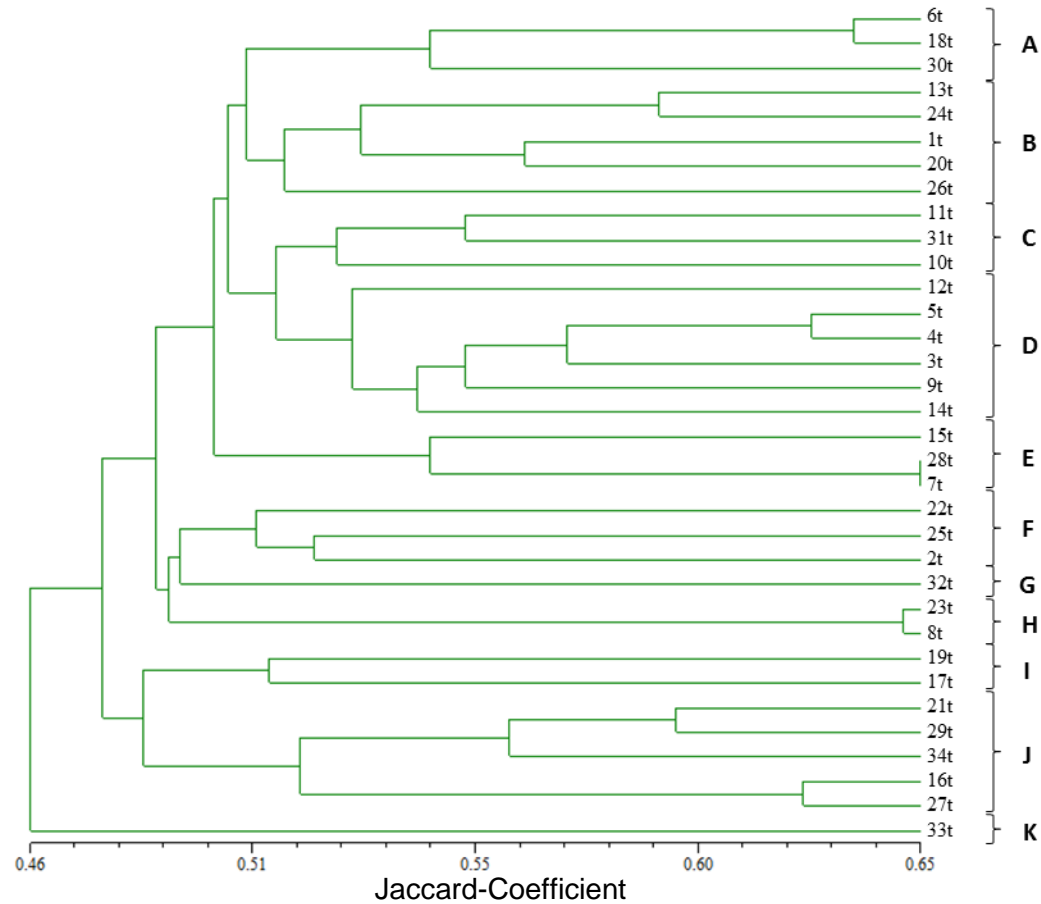

**Figure S1.** Population structure in the investigated association panel of 34 starch potato cultivars based on 54 linkage group specific SSR primer combinations and 19 AFLP primer combinations. The UPGMA dendrogram based on the Jaccard's coefficient is shown. The potato cultivars are shown with the drought tolerance rank from 1t = most tolerant to 34t = most sensitive.
